# Supplementary material for: A data-driven prospective study of dementia among older adults in the United States
Source: PubMed Central journal article supplement (PMC7540891; doi:10.1371/journal.pone.0239994), 2020-10-07

|                                    | Overall | NH White Men | NH White Women | NH Black Men | NH Black Women |
|------------------------------------|---------|--------------|----------------|--------------|----------------|
| Lower Education                    | 1       | 1            | 1              | 1            | 1              |
| Lower Income                       | 2       | 4            | 3              | 6            | 6              |
| Lower Wealth                       | 3       | 2            | 16             | 5            | 4              |
| Lower SR Health                    | 4       | 5            | 2              | 19           | 2              |
| Lonely                             | 5       | 6            | 7              | 10           | 7              |
| Lower SR Vision                    | 6       | 12           | 19             | 9            | 11             |
| Lower SR Childhood Health          | 7       | 11           | 18             | 7            | 16             |
| Lower Mother's Education           | 8       | 27           | 6              | 13           | 9              |
| Lower Age at First Birth           | 9       | 22           | 4              | 31           | 8              |
| Food Insecurity                    | 10      | 24           | 20             | 18           | 5              |
| Higher Parity PGS                  | 11      | 16           | 14             | 21           | 24             |
| Medicaid                           | 12      | 13           | 32             | 22           | 15             |
| Lower Father Occupational Status   | 13      | 55           | 10             | 3            | 14             |
| Lower Father's Education           | 14      | 57           | 11             | 12           | 10             |
| Higher Coronary Artery Disease PGS | 15      | 49           | 17             | 17           | 12             |
| Retired                            | 16      | 20           | 26             | 4            | 50             |
| Higher AD PGS                      | 17      | 18           | 38             | 11           | 34             |
| Lower Neighborhood Safety          | 18      | 19           | 23             | 43           | 21             |
| Diabetes                           | 19      | 21           | 13             | 47           | 25             |
| Higher Parity                      | 20      | 59           | 37             | 8            | 3              |
| Lower SR Childhood SES             | 21      | 44           | 22             | 14           | 28             |
| Received Food Stamps               | 22      | 17           | 46             | 28           | 19             |
| Hypertension                       | 23      | 33           | 24             | 30           | 23             |
| Lower General Cognition PGS        | 24      | 9            | 21             | 63           | 18             |
| Psychiatric Illness                | 25      | 7            | 12             | 52           | 49             |
| Lower Longevity PGS                | 26      | 34           | 36             | 24           | 27             |
| Stroke                             | 27      | 23           | 25             | 29           | 46             |
| Lower SR Hearing                   | 28      | 3            | 30             | 60           | 31             |
| Veteran                            | 29      | 30           | 49             | 2            | 44             |
| Dizziness                          | 30      | 29           | 27             | 61           | 13             |
| Heavy Alcohol Use                  | 31      | 36           | 39             | 26           | 29             |
| Southern Born                      | 32      | 39           | 15             | 55           | 22             |
| Headaches                          | 33      | 47           | 9              | 20           | 55             |
| Wheezing                           | 34      | 8            | 43             | 45           | 37             |
| Heart Problems                     | 35      | 35           | 33             | 34           | 32             |
| Fatigue                            | 36      | 43           | 5              | 46           | 43             |
| Pain                               | 37      | 32           | 42             | 48           | 17             |
| Active Smoker                      | 38      | 25           | 53             | 32           | 30             |
| Higher Age at Last Birth           | 39      | 14           | 8              | 56           | 65             |
| Short of Breath                    | 40      | 15           | 51             | 35           | 45             |
| Lower Age at Menopause PGS         | 41      | 55           | 20             |              |                |
| Not Married/Partnered              | 42      | 38           | 34             | 54           | 26             |
| Lung Disease                       | 43      | 26           | 52             | 37           | 40             |
| Ever Widowed                       | 44      | 51           | 31             | 42           | 39             |
| Less Religious                     | 45      | 50           | 61             | 15           | 38             |
| No Friends Nearby                  | 46      | 28           | 56             | 39           | 42             |
| Unemployed                         | 47      | 54           | 41             | 38           | 33             |
| No Relatives Nearby                | 48      | 52           | 40             | 16           | 60             |
| Ever Divorced                      | 49      | 31           | 48             | 41           | 52             |
| Medicare                           | 50      | 10           | 62             | 44           | 59             |
| Arthritis                          | 51      | 40           | 65             | 23           | 48             |
| Back Pain                          | 52      | 41           | 54             | 27           | 56             |
| Higher Diabetes PGS                | 53      | 37           | 28             | 50           | 64             |
| No Insurance                       | 54      | 45           | 35             | 51           | 51             |
| Cancer                             | 55      | 56           | 44             | 49           | 36             |
| Low/No Vigorous Physical Activity  | 56      | 48           | 59             | 40           | 41             |
| Ever Smoked                        | 57      | 62           | 63             | 33           | 35             |
| Higher Myocardial Infarction PGS   | 58      | 46           | 57             | 36           | 62             |
| Higher BMI                         | 59      | 61           | 58             | 25           | 57             |
| Lower Education PGS                | 60      | 53           | 29             | 62           | 58             |
| Childless                          | 61      | 58           | 45             | 57           | 47             |
| Foreign Born                       | 62      | 60           | 47             | 53           | 61             |
| Lower Age at First Birth PGS       | 63      | 42           | 60             | 58           | 63             |
| Lower Height PGS                   | 64      | 63           | 50             | 59           | 53             |
| Lower Age at Menarche PGS          | 65      | 64           | 54             |              |                |

VIMP Rank Order

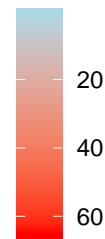

Supplement: pone.0239994.s011.pdf [file pone.0239994.s011.pdf]
