# Supplementary material for: A data-driven prospective study of dementia among older adults in the United States
Source: PubMed Central journal article supplement (PMC7540891; doi:10.1371/journal.pone.0239994), 2020-10-07

### NH White Men

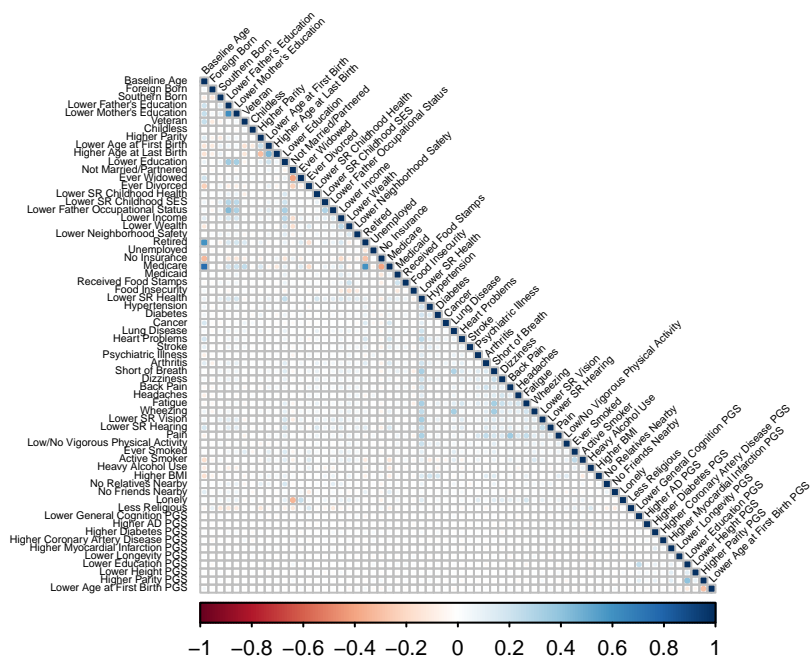

### NH White Women

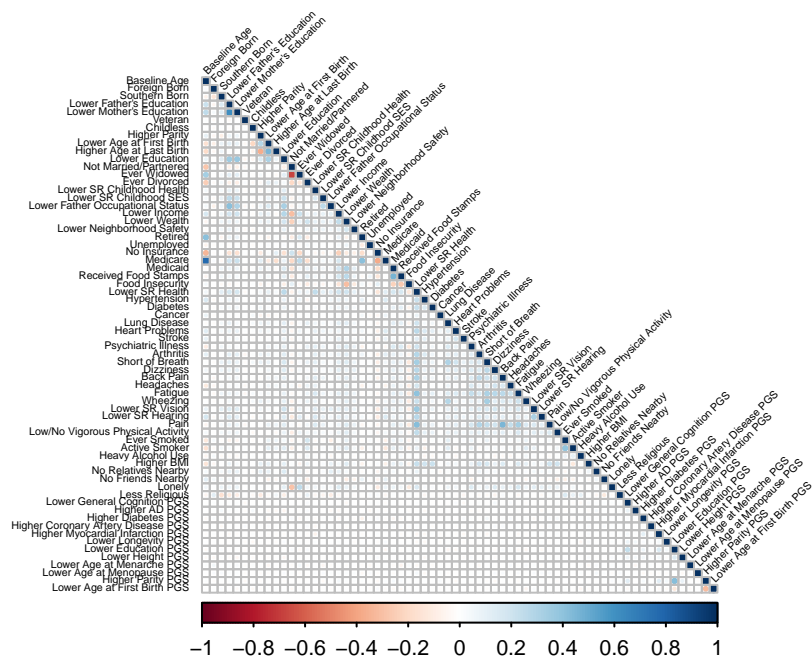

### NH Black Men

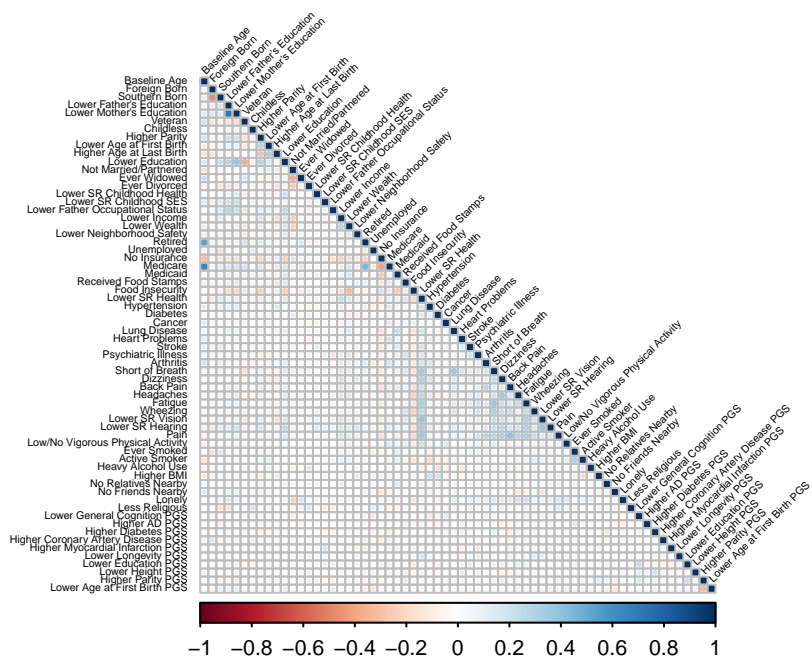

### NH Black Women

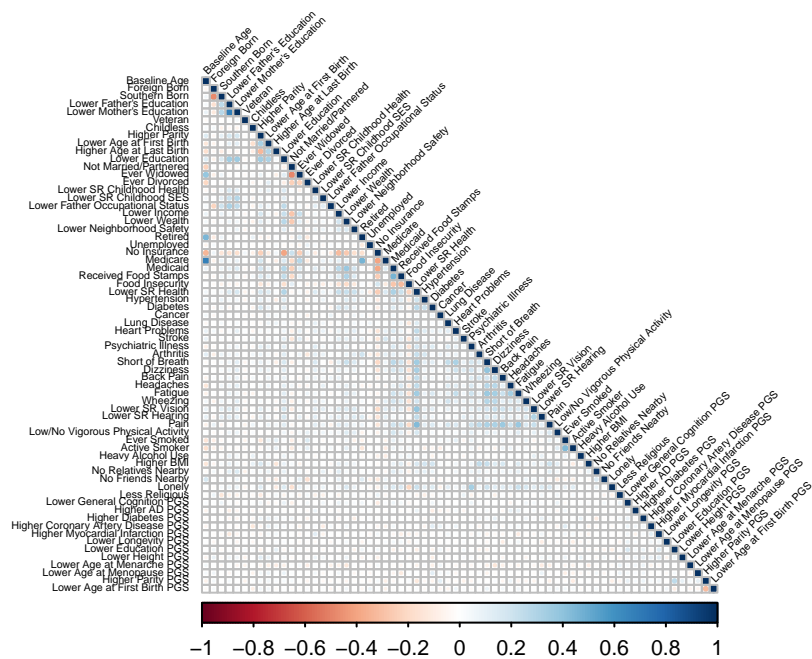

Supplement: pone.0239994.s001.pdf [file pone.0239994.s001.pdf]
