# Supplementary material for: A data-driven prospective study of dementia among older adults in the United States
Source: PubMed Central journal article supplement (PMC7540891; doi:10.1371/journal.pone.0239994), 2020-10-07
Supplement: pone.0239994.s002.pdf [file pone.0239994.s002.pdf]

# Sociodemographic

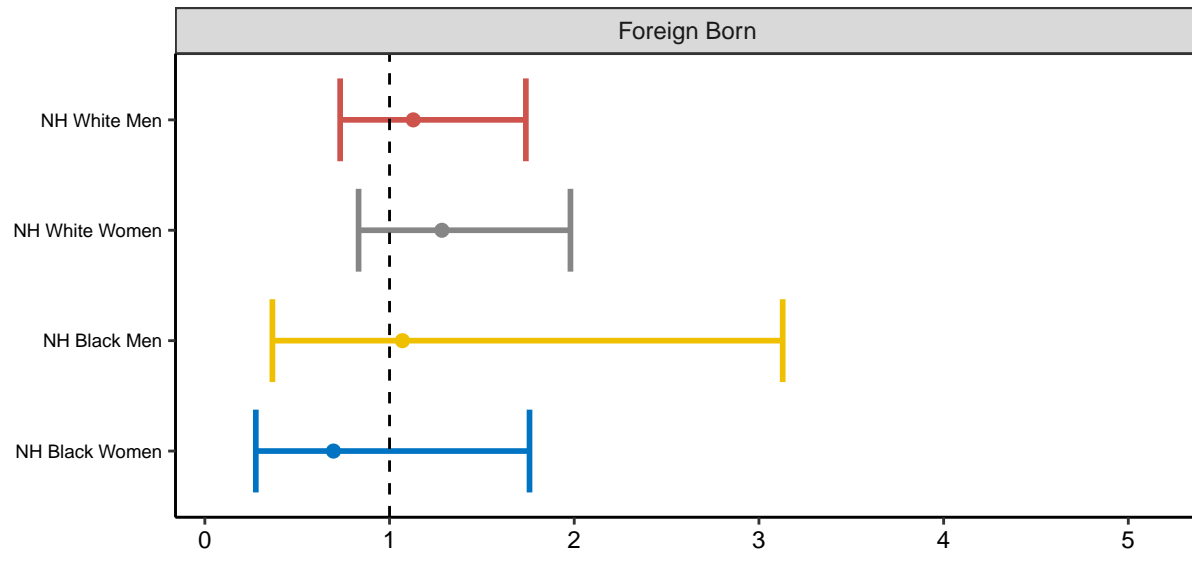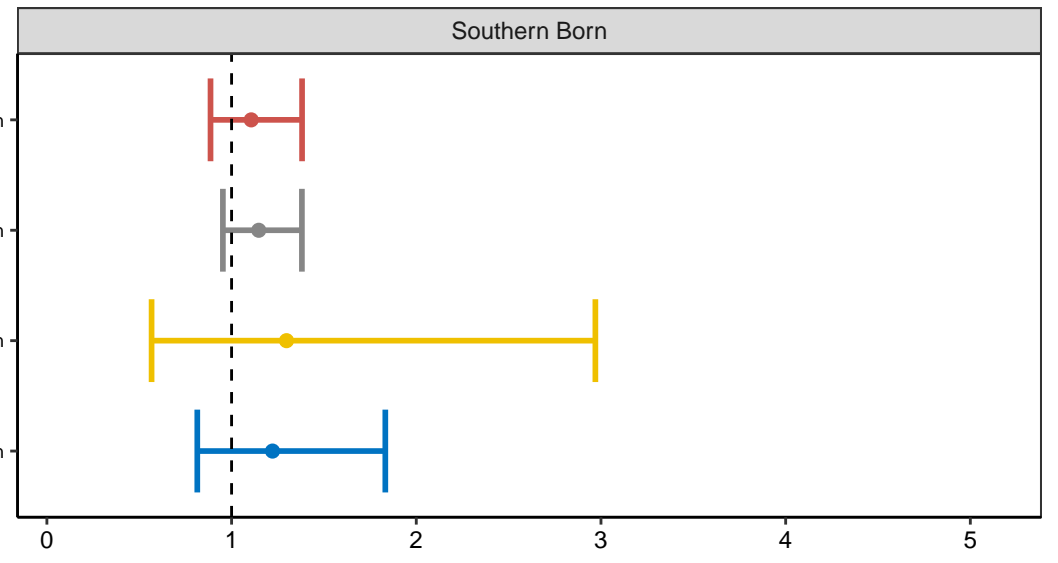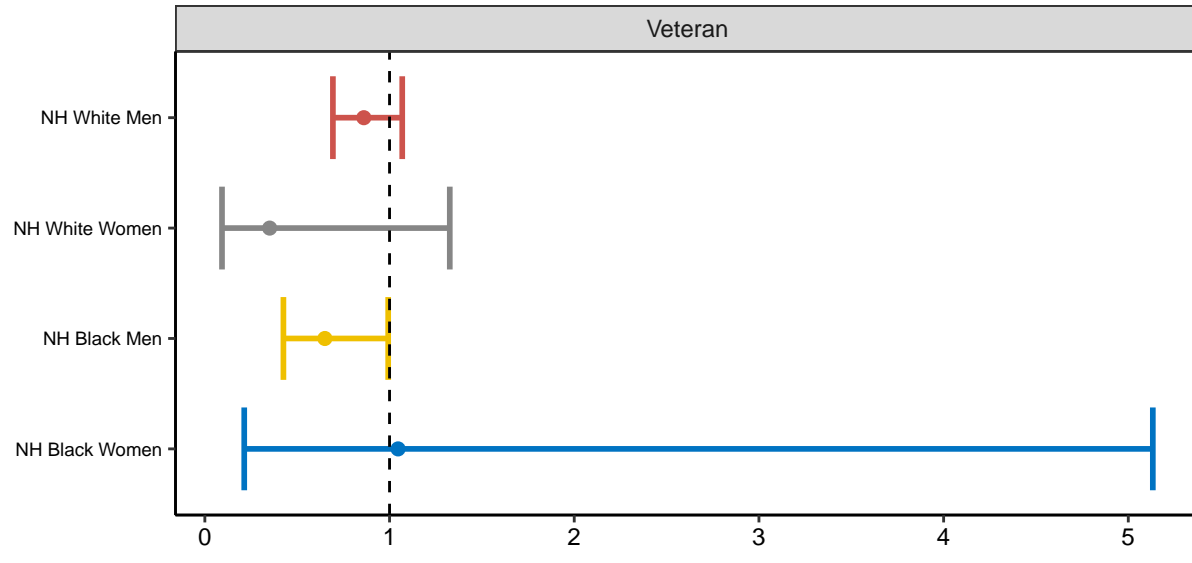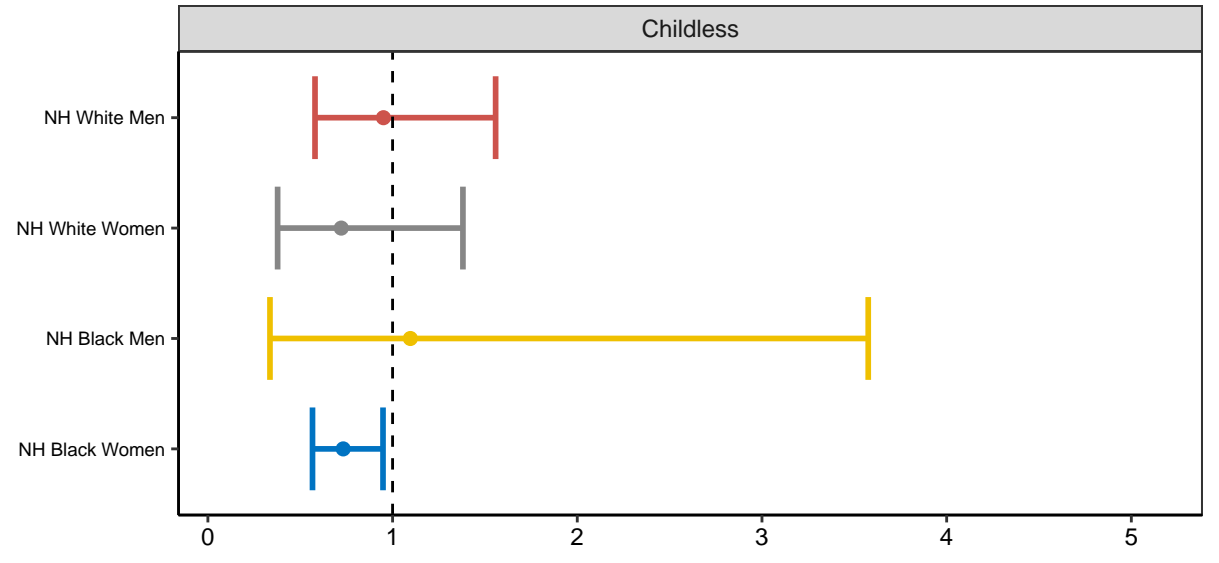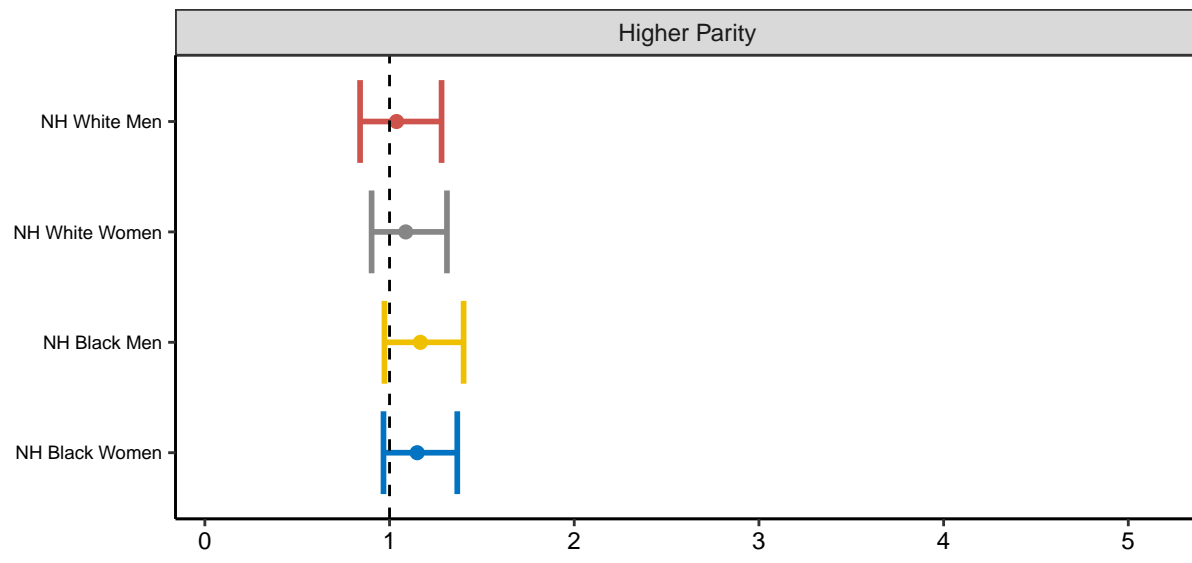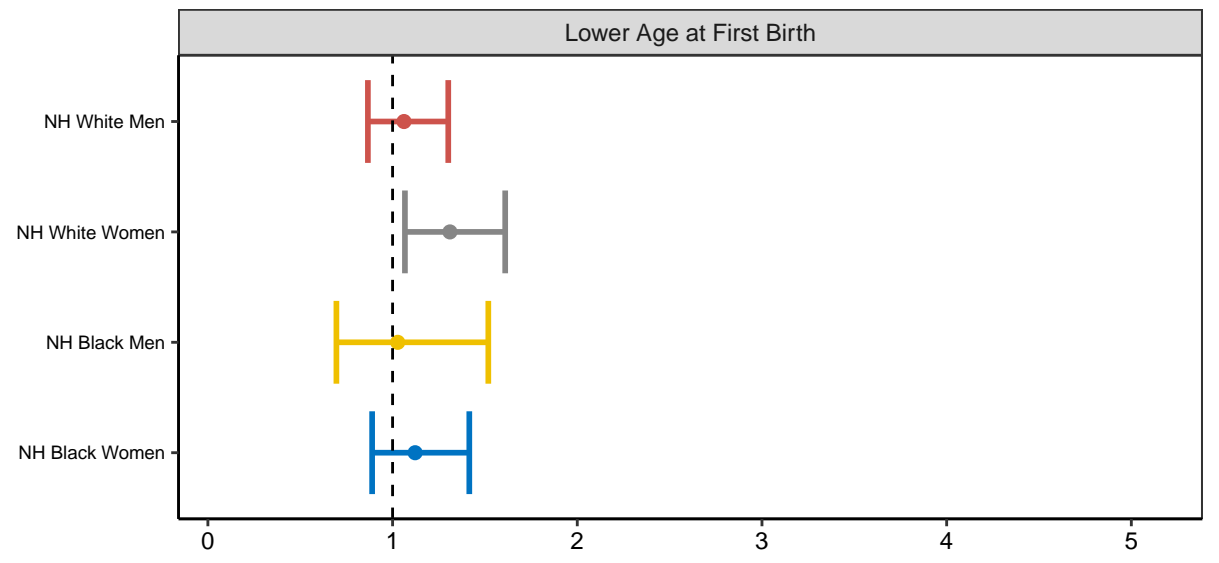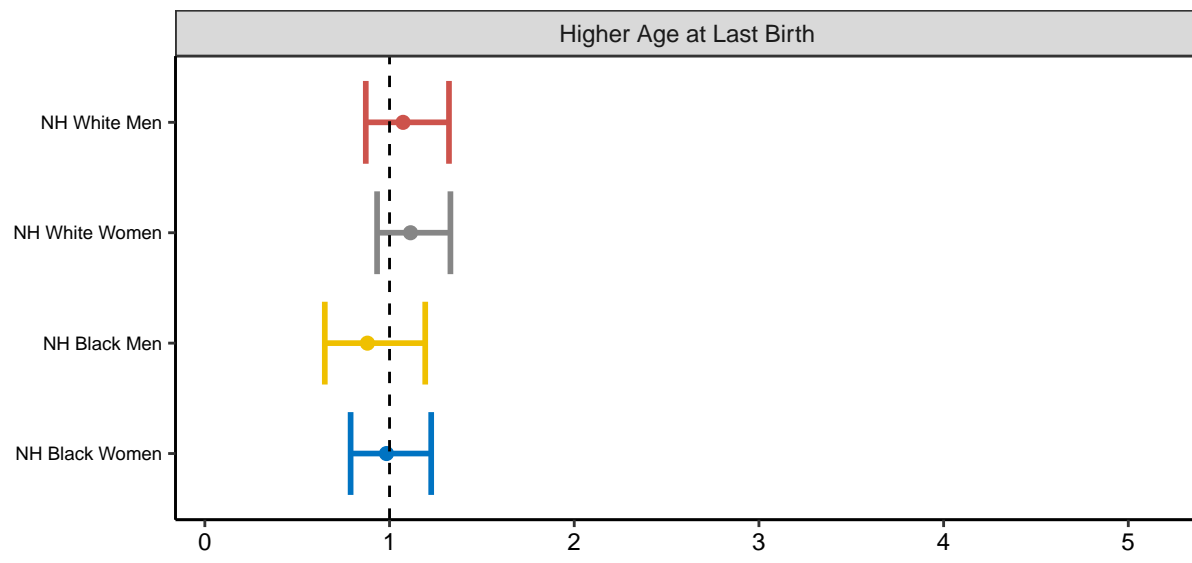

Hazard Ratio

Early-Life

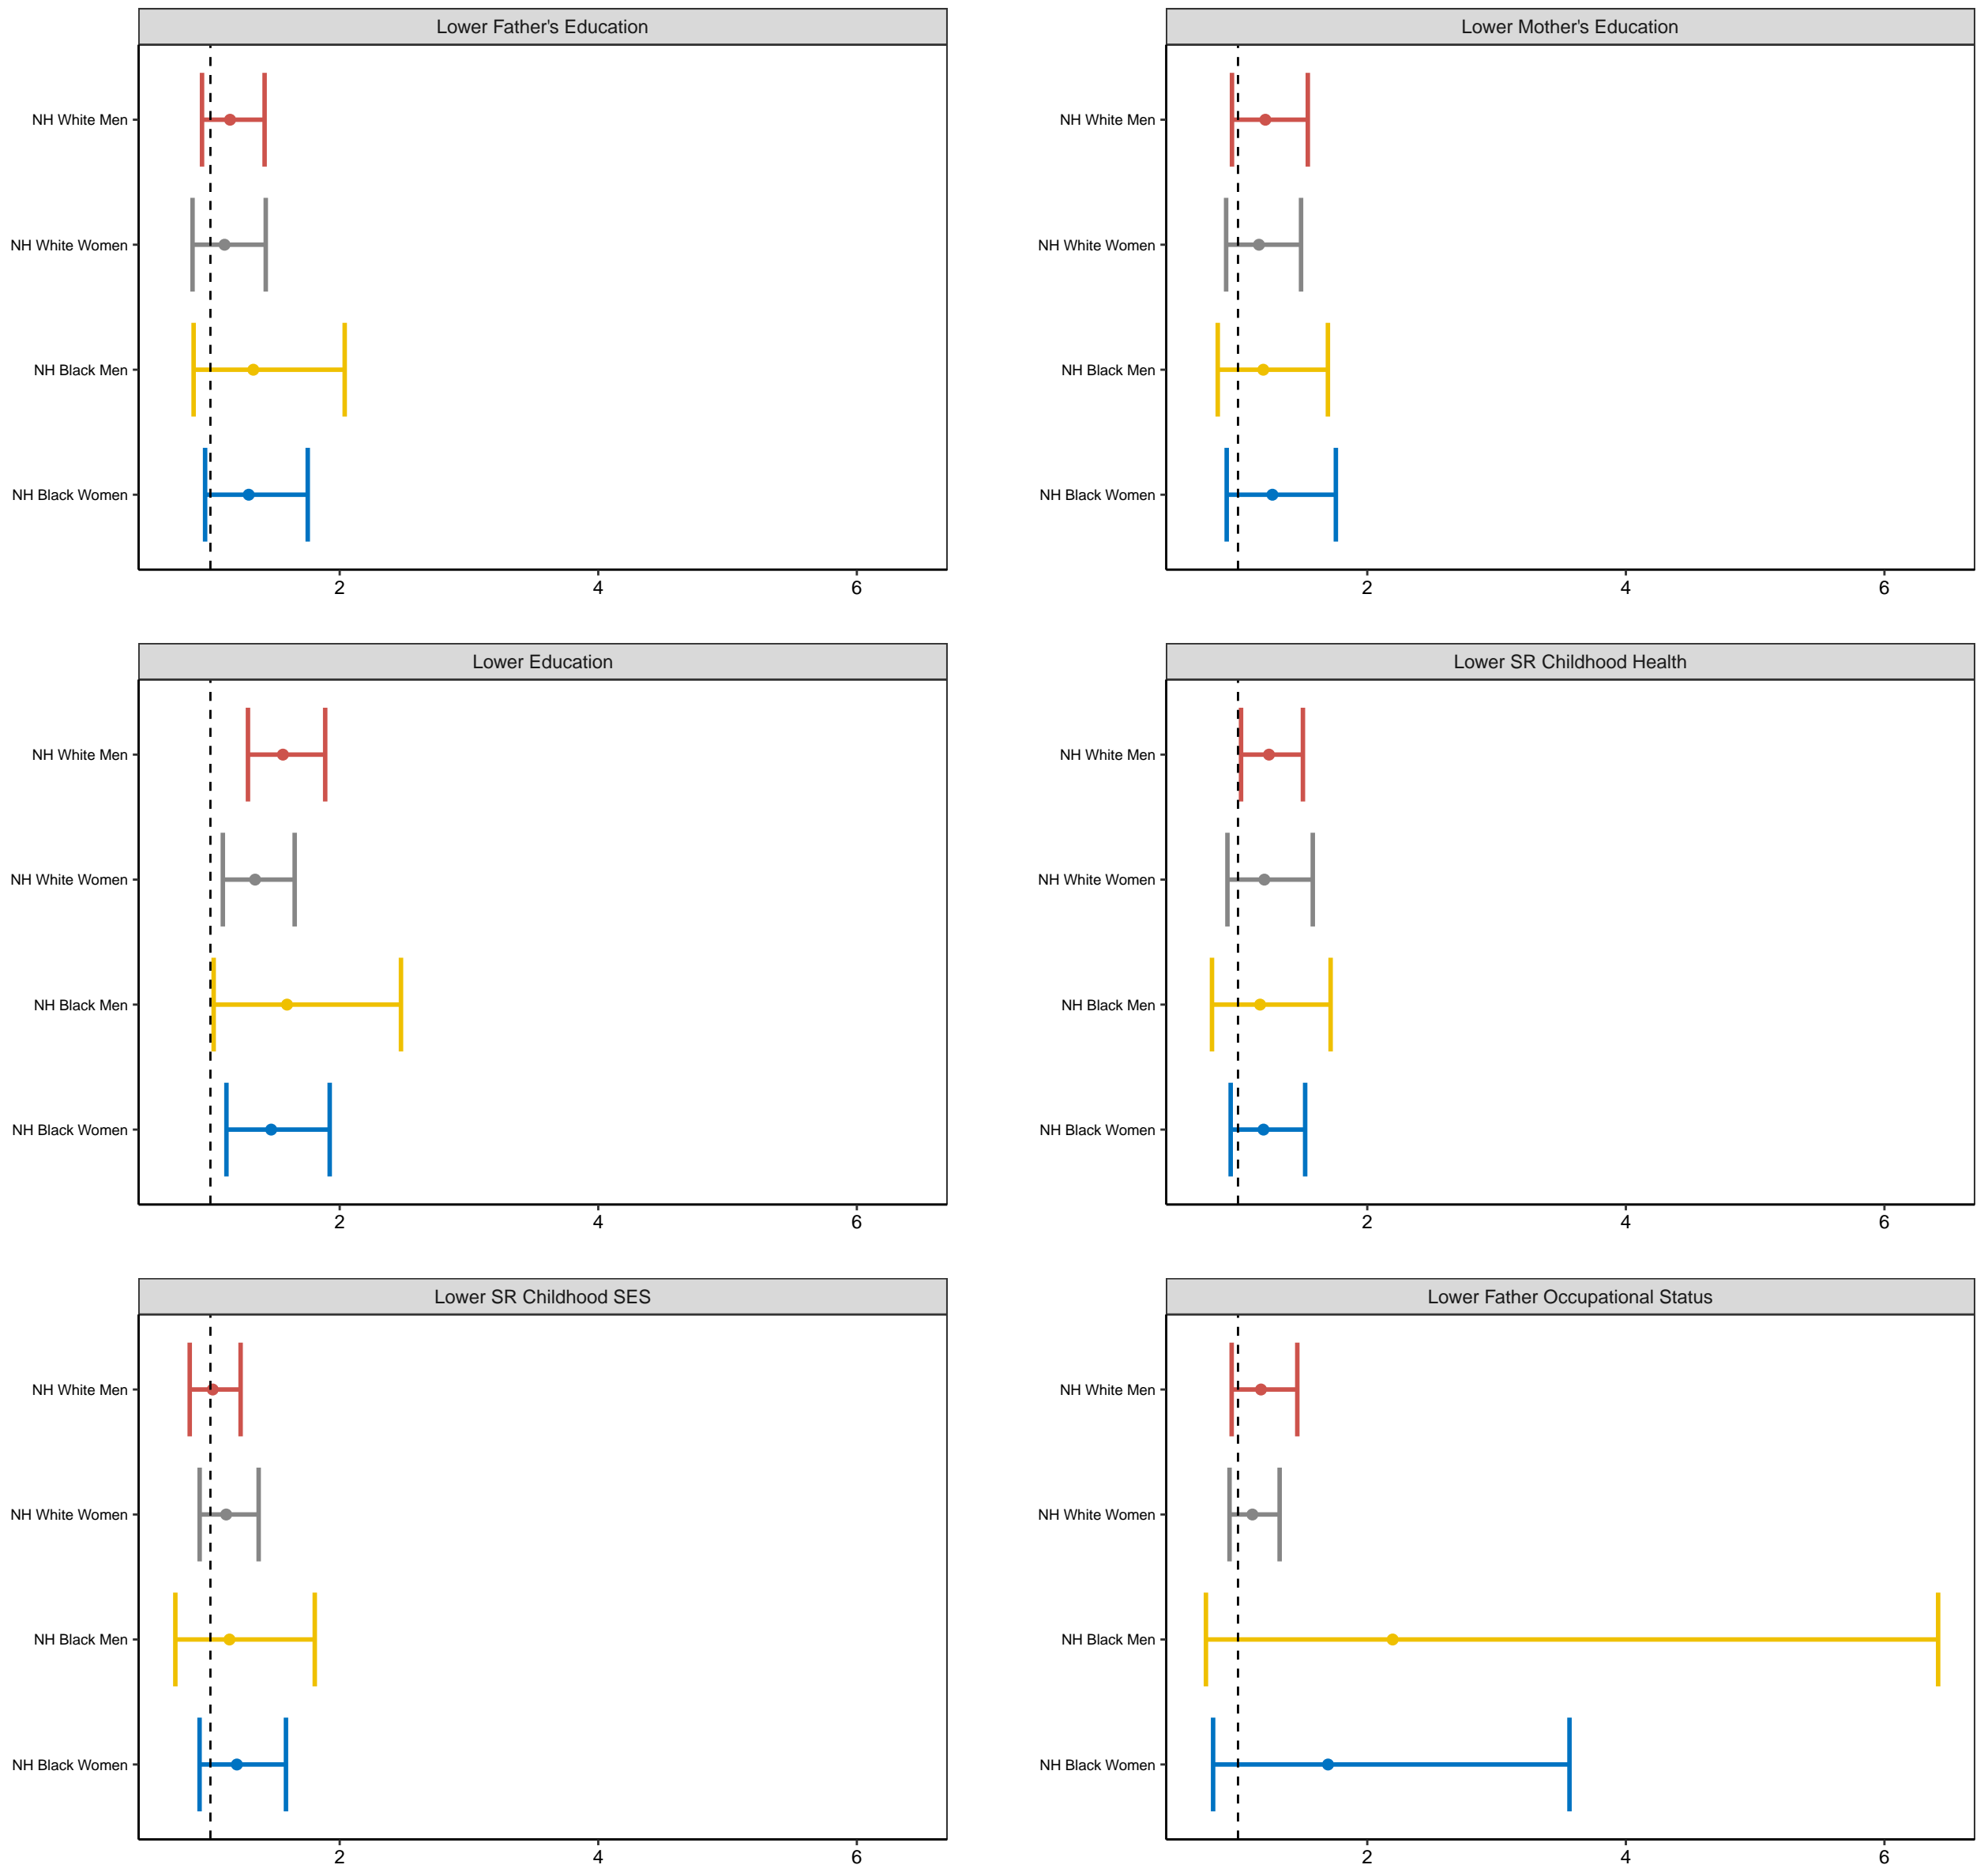

Hazard Ratio

# Economic

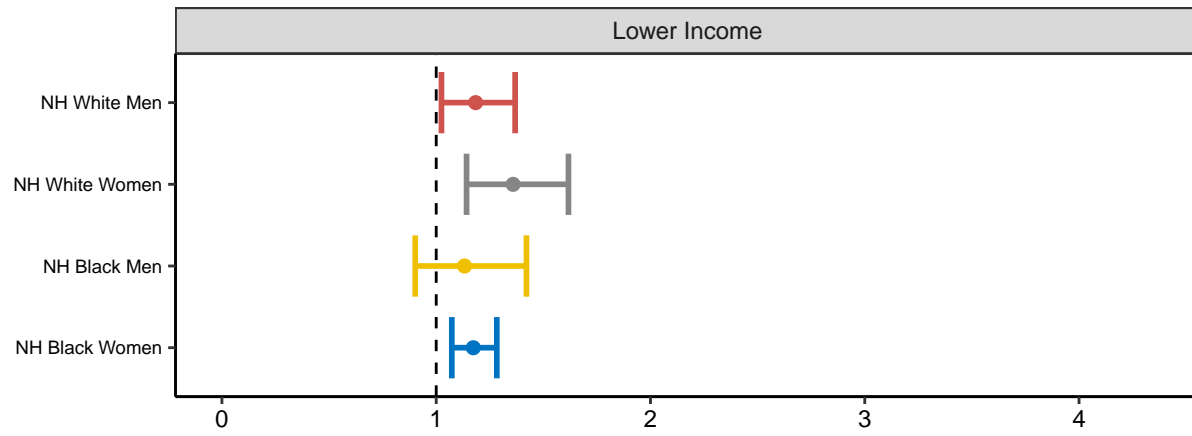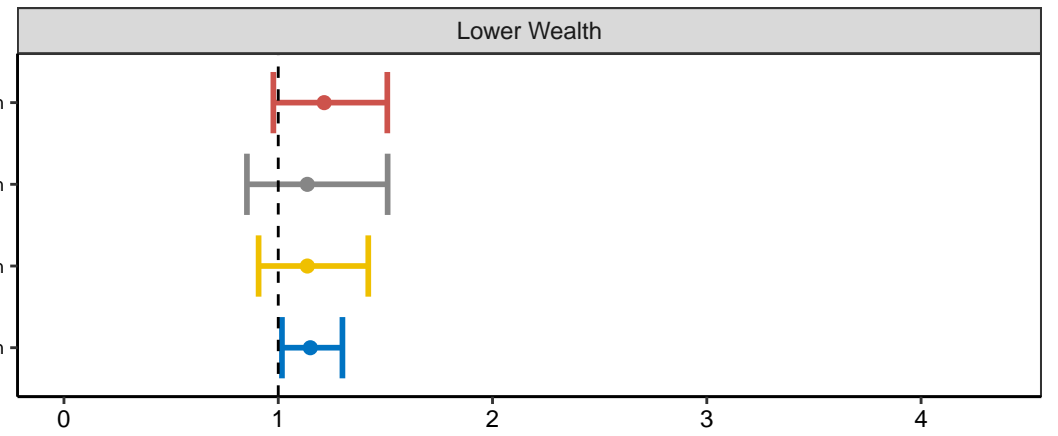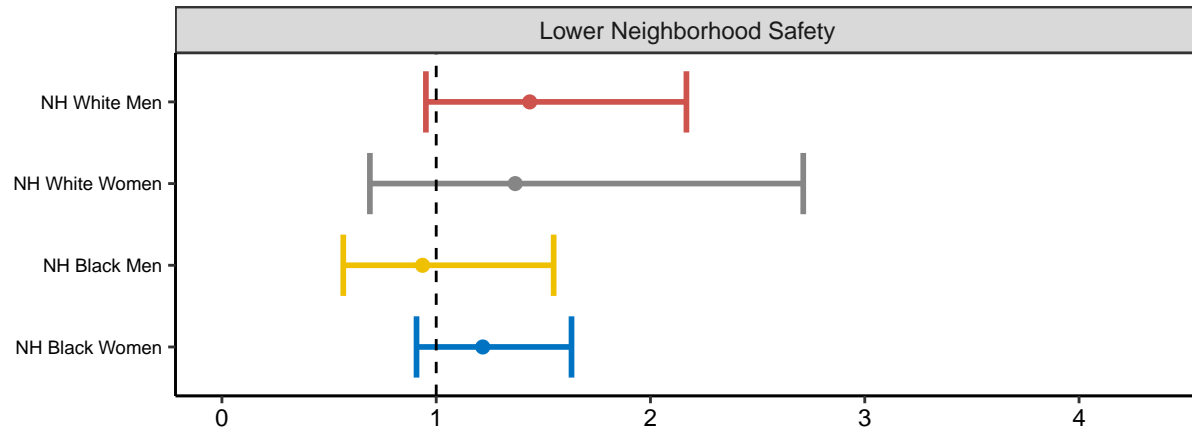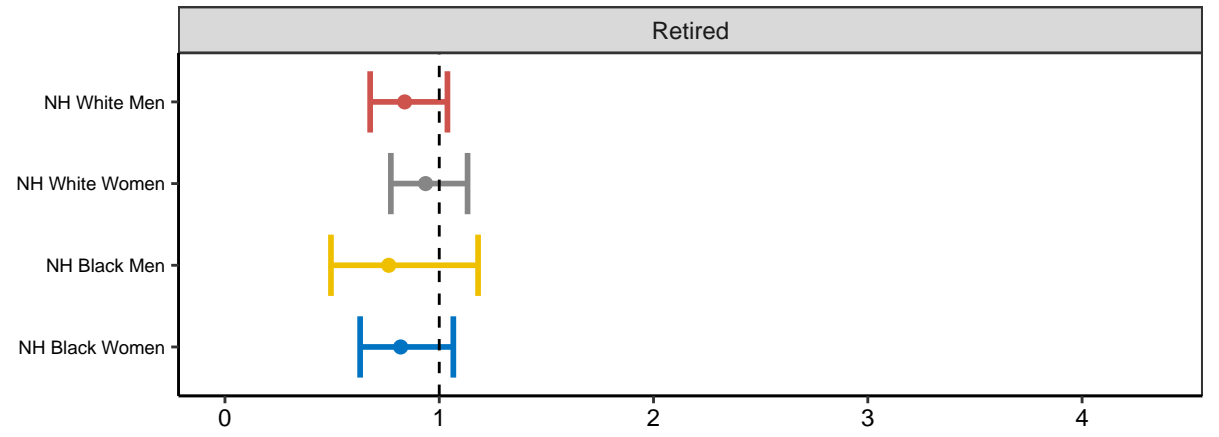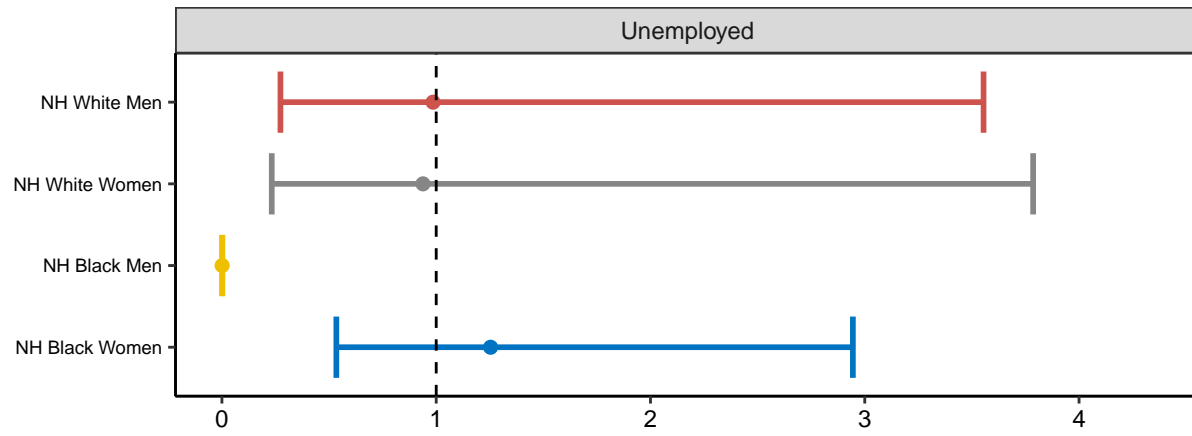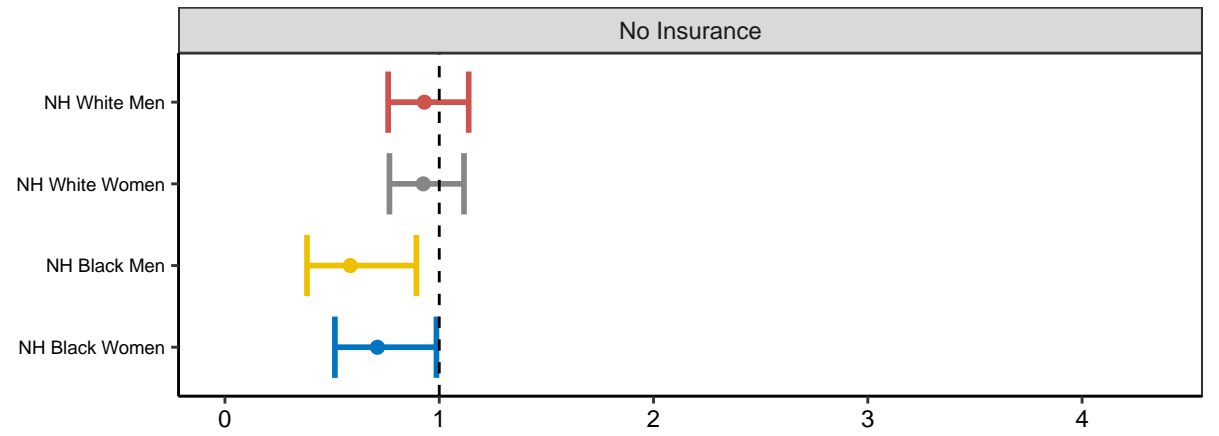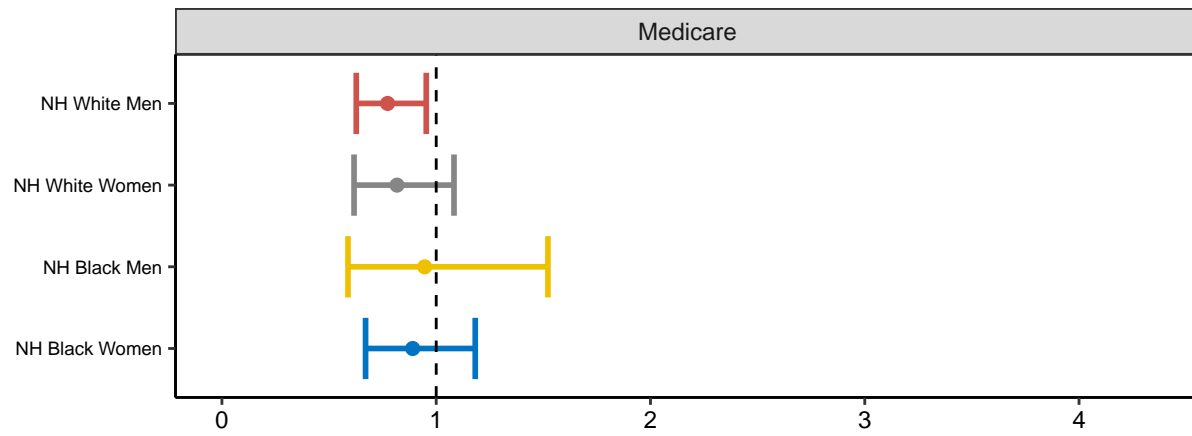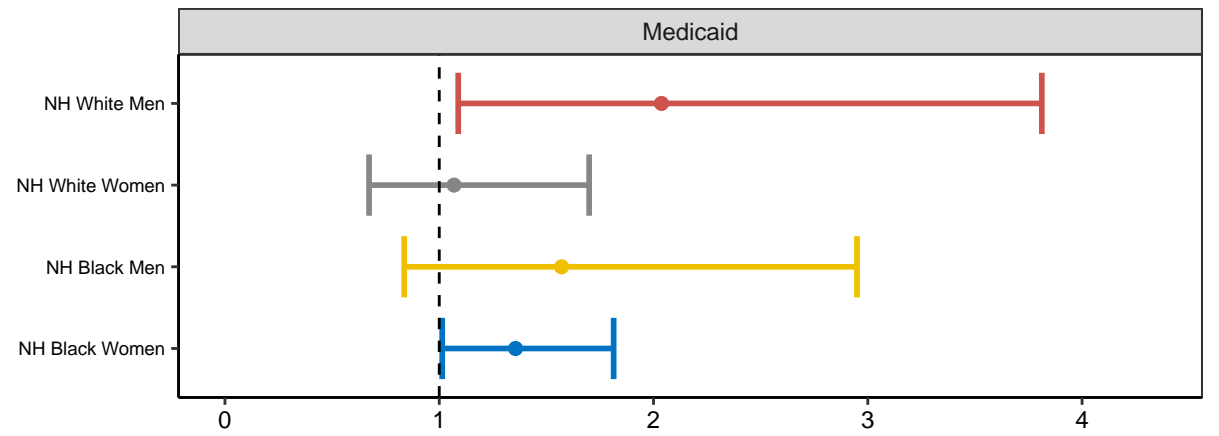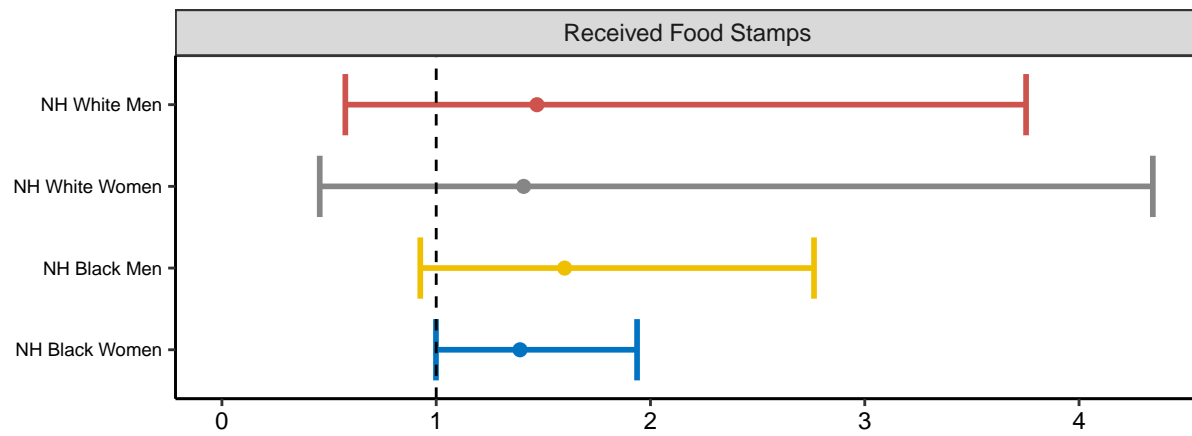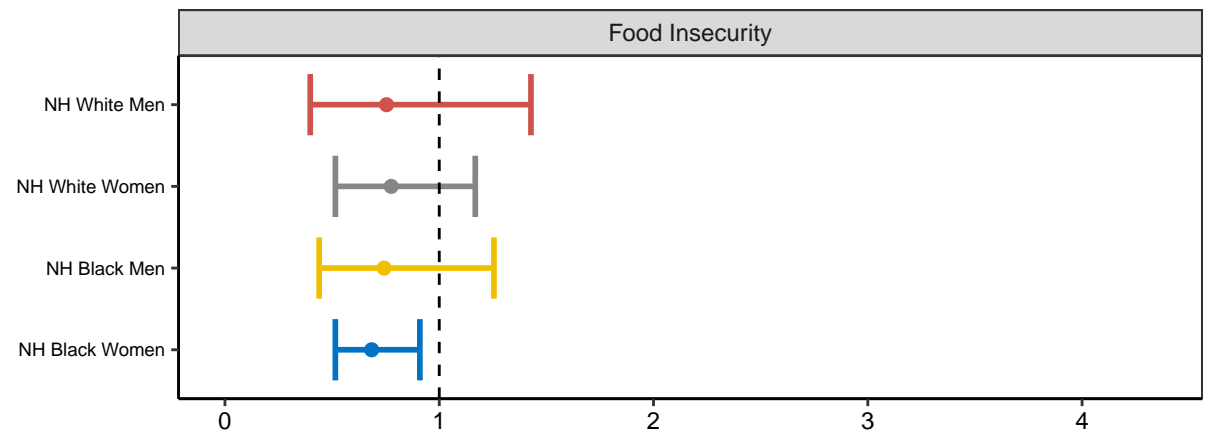

Hazard Ratio

# Health

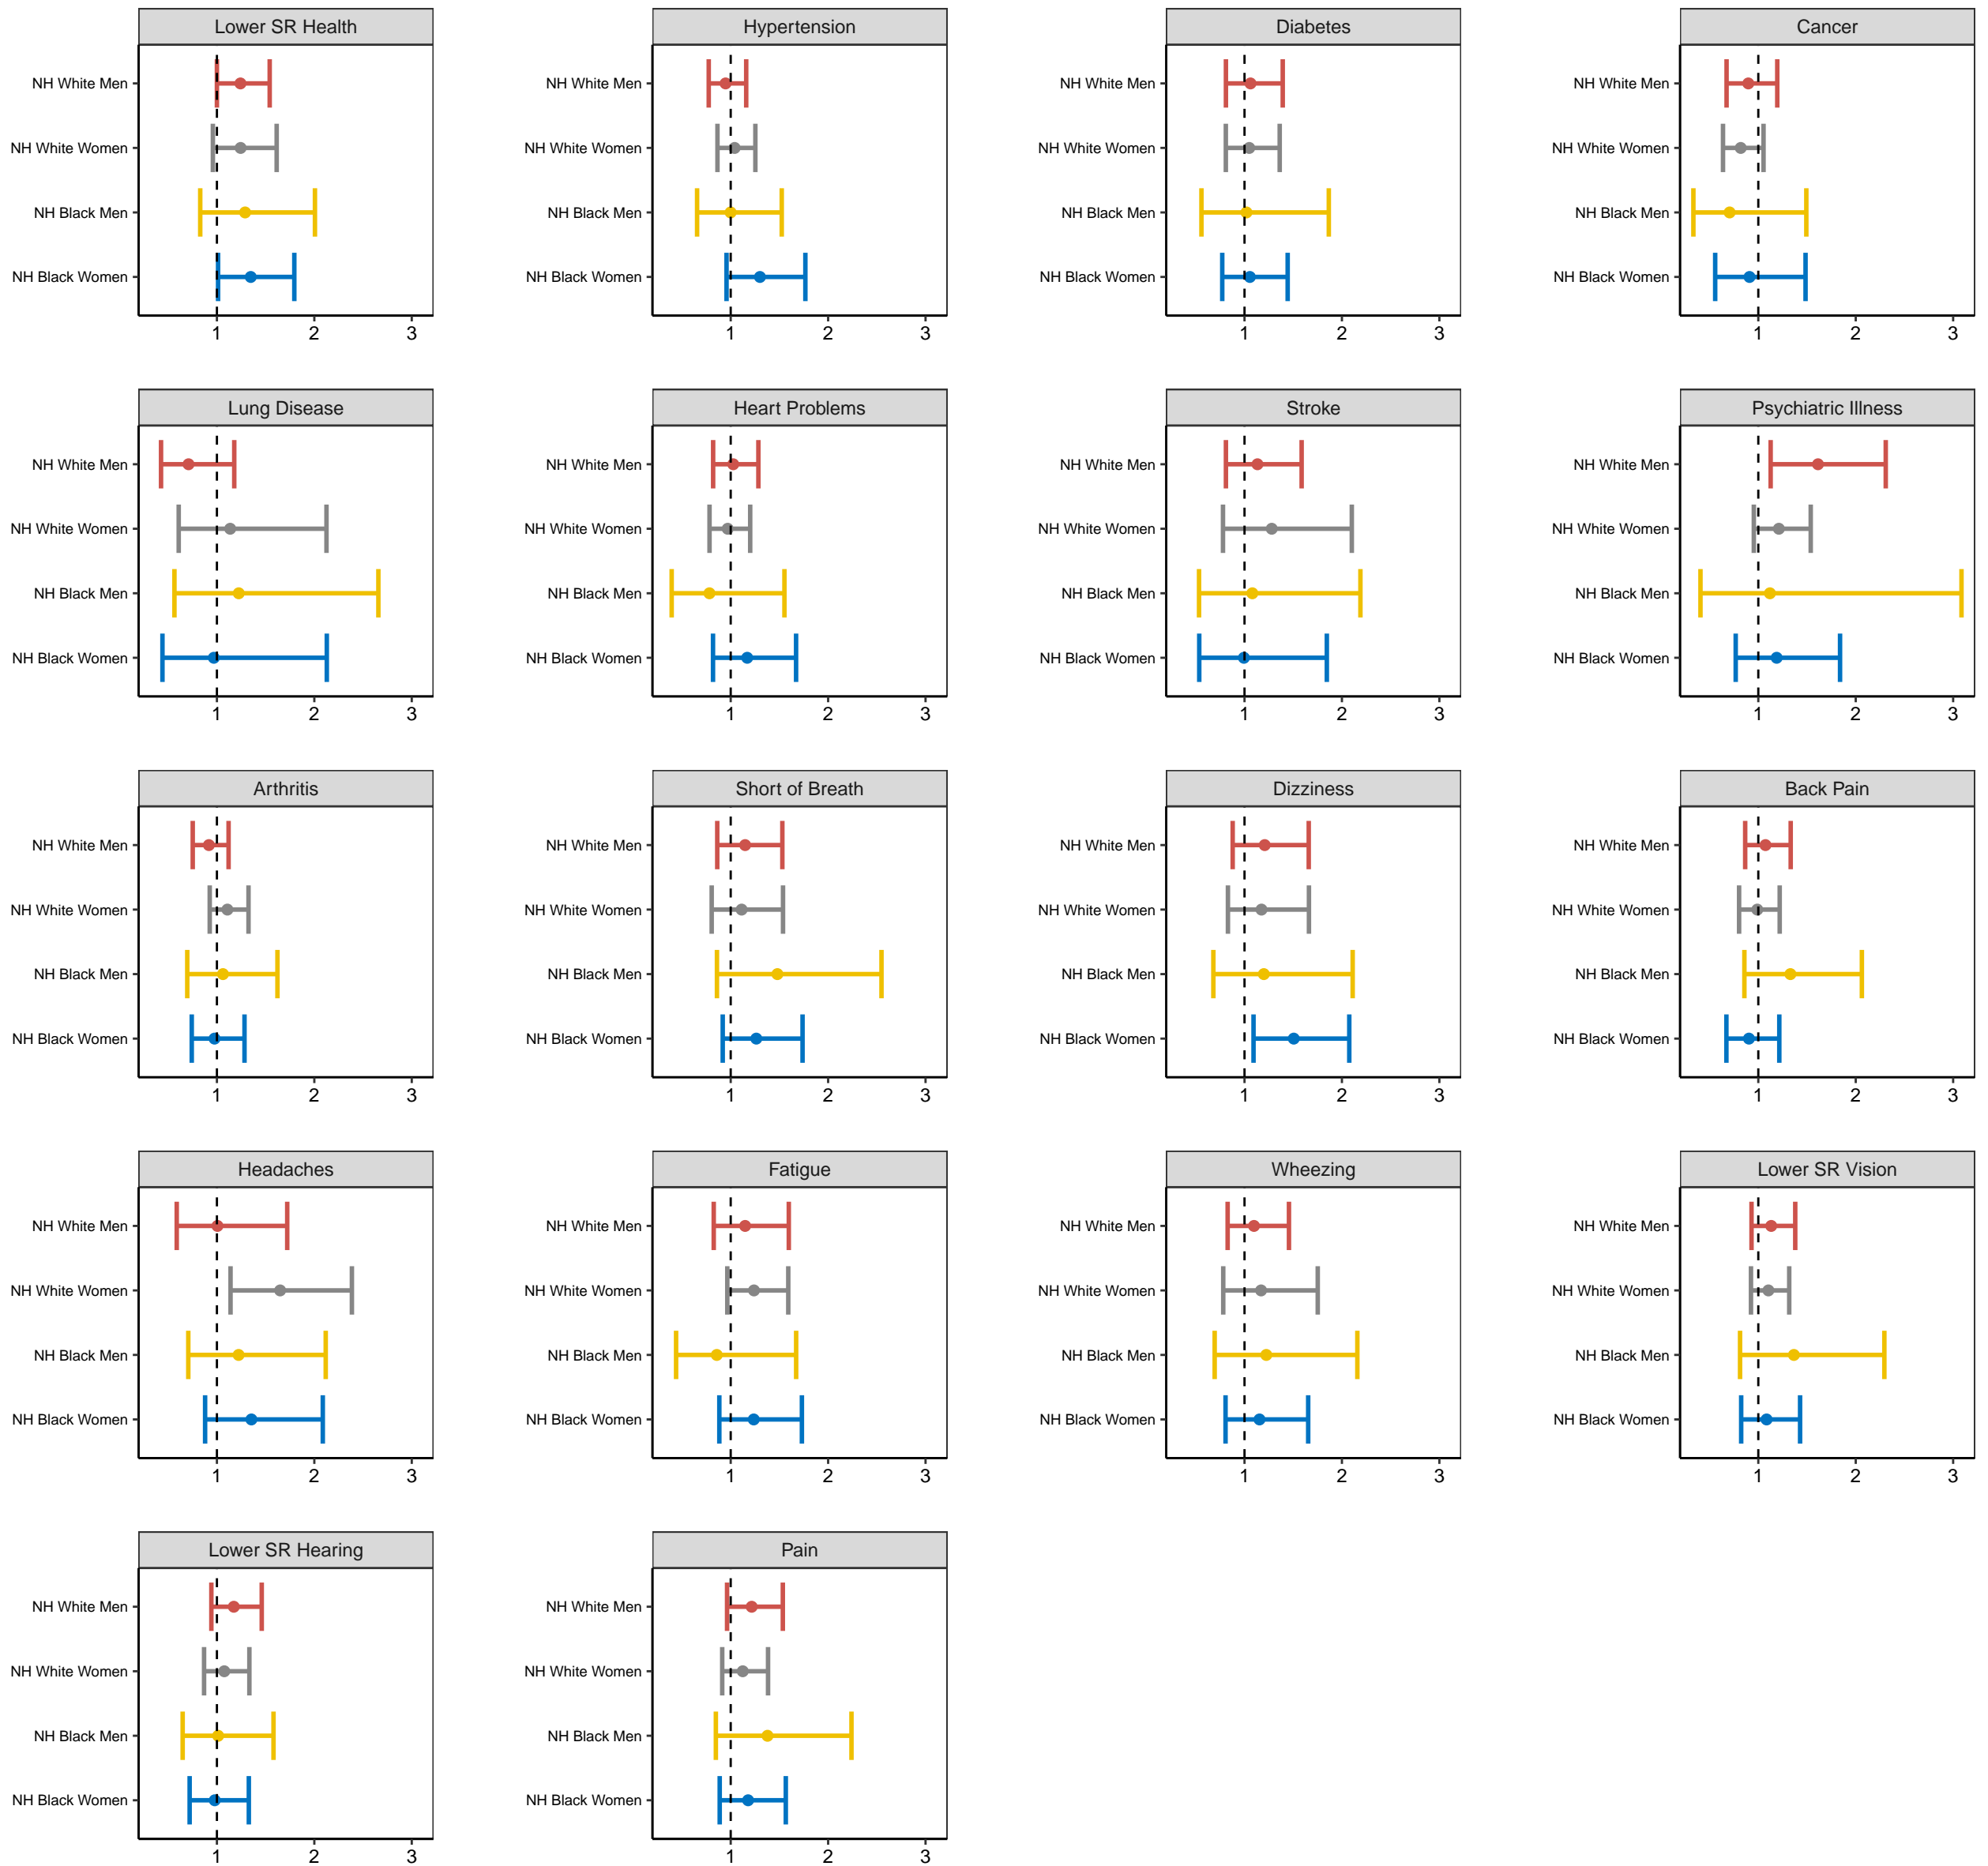

Hazard Ratio

# Behaviors

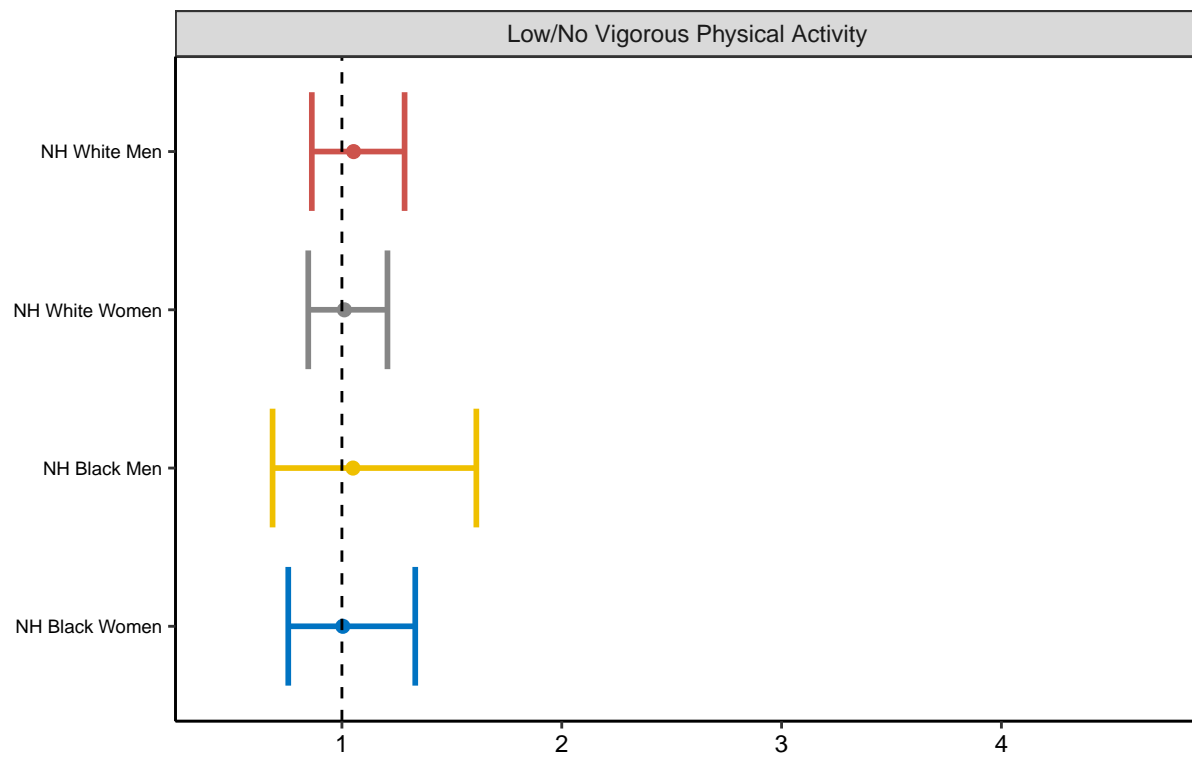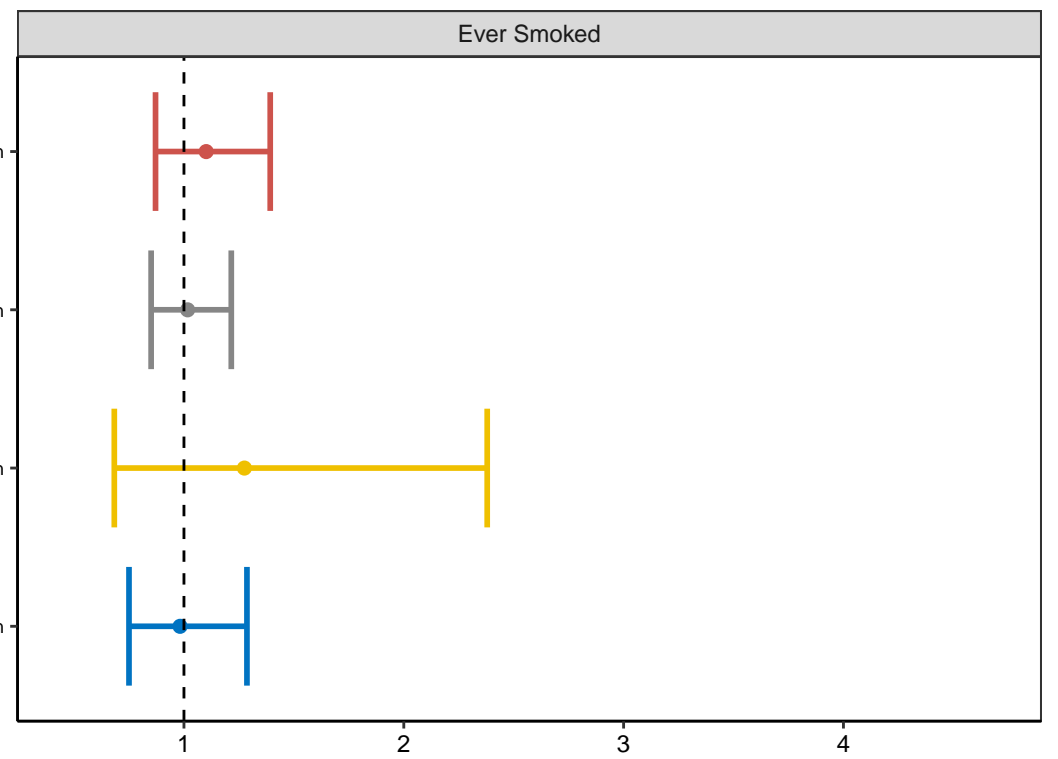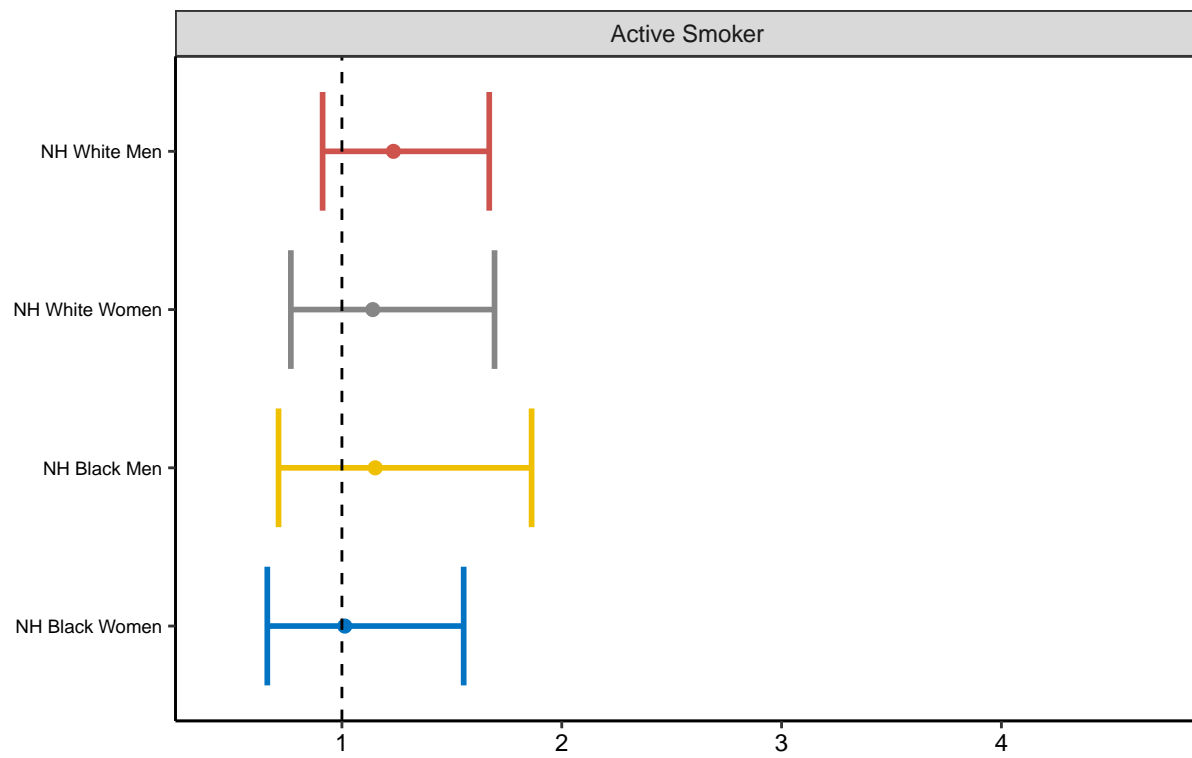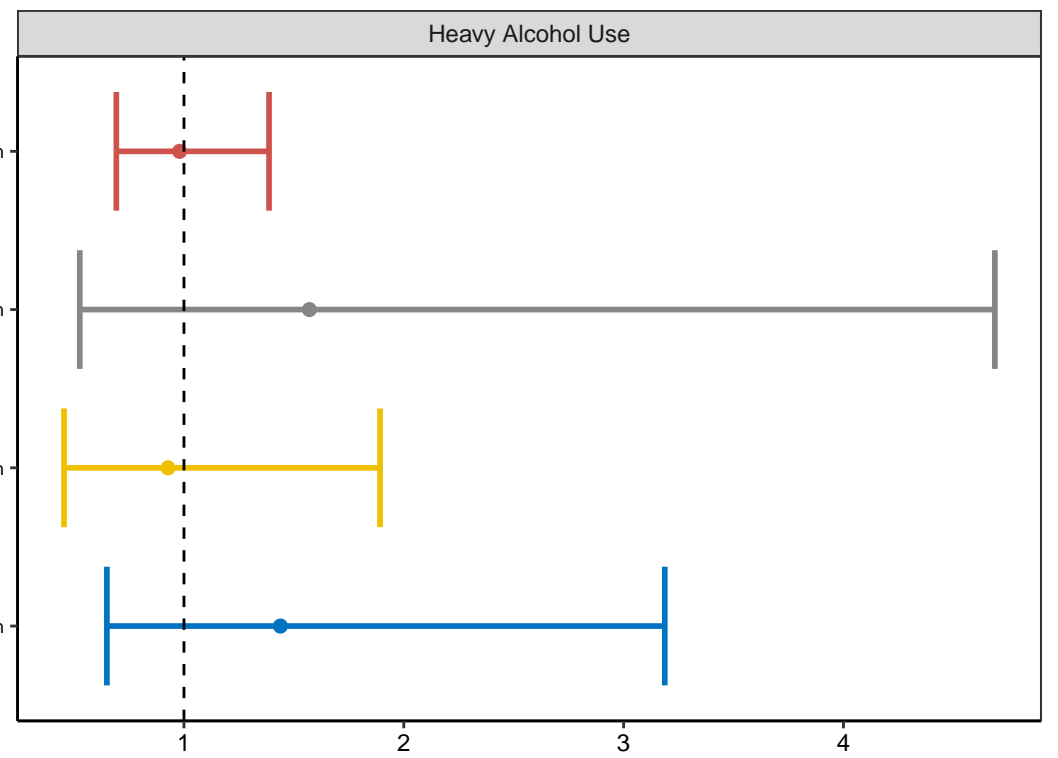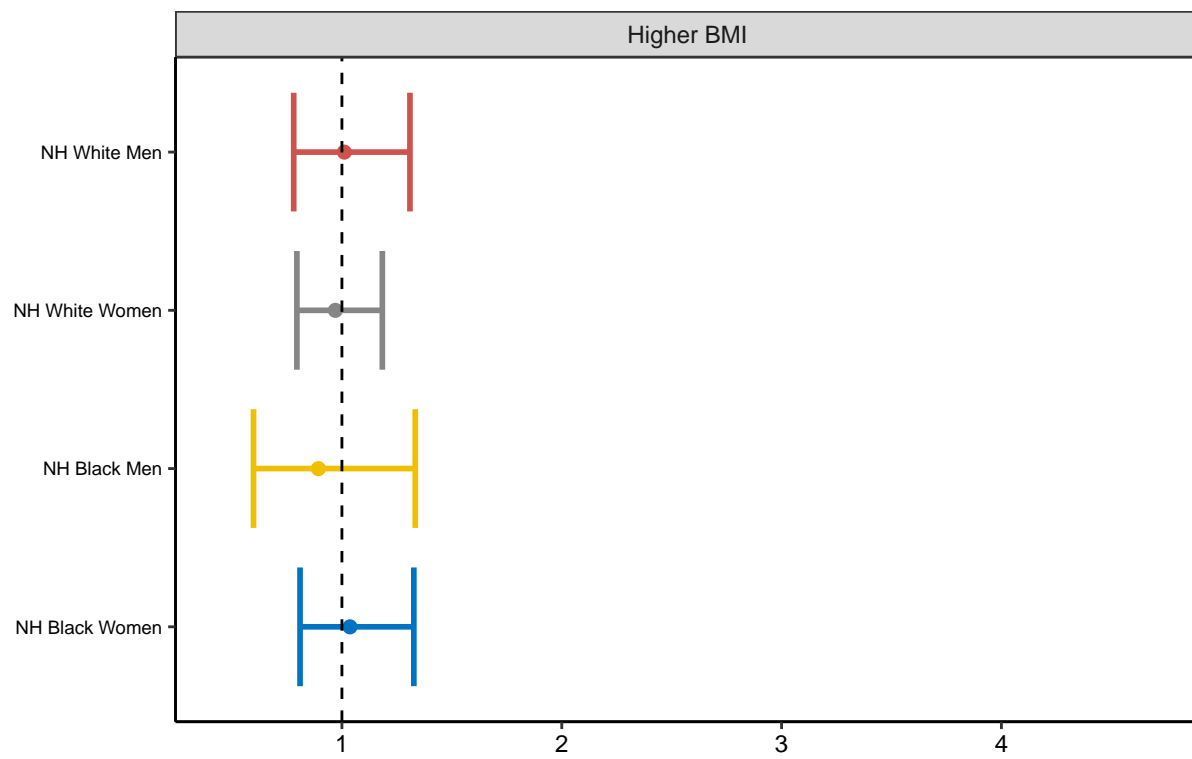

Hazard Ratio

# Social Ties

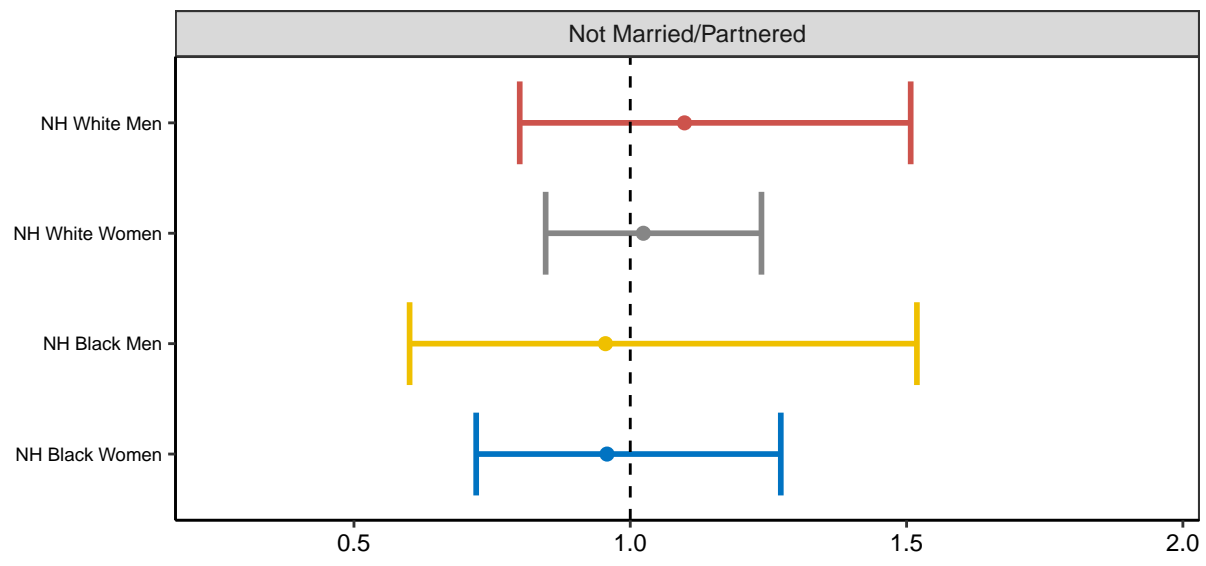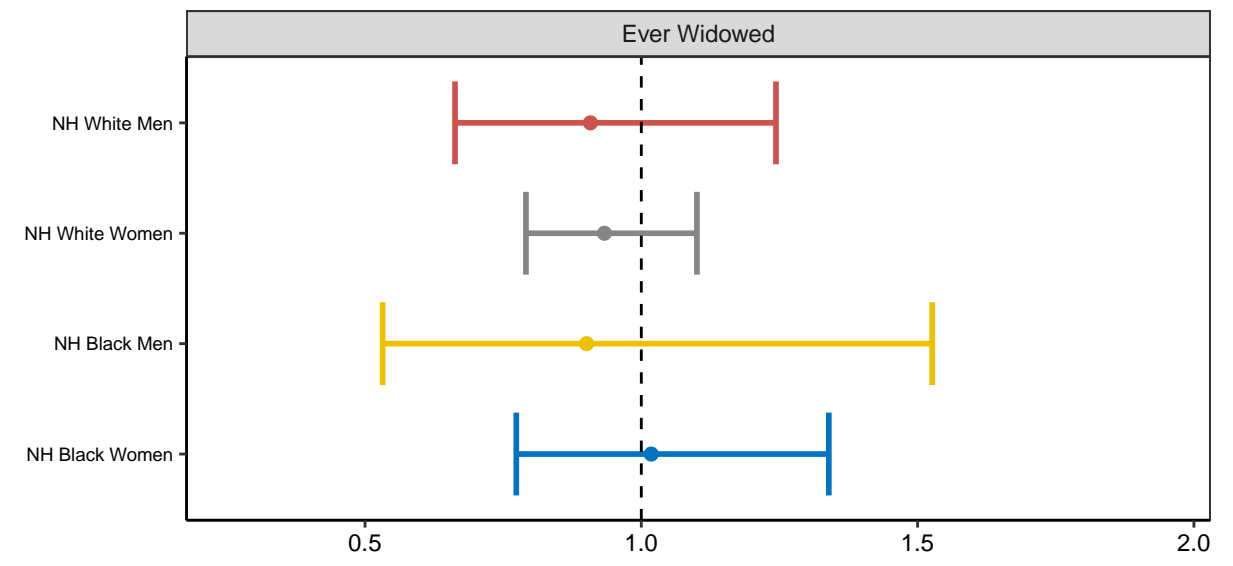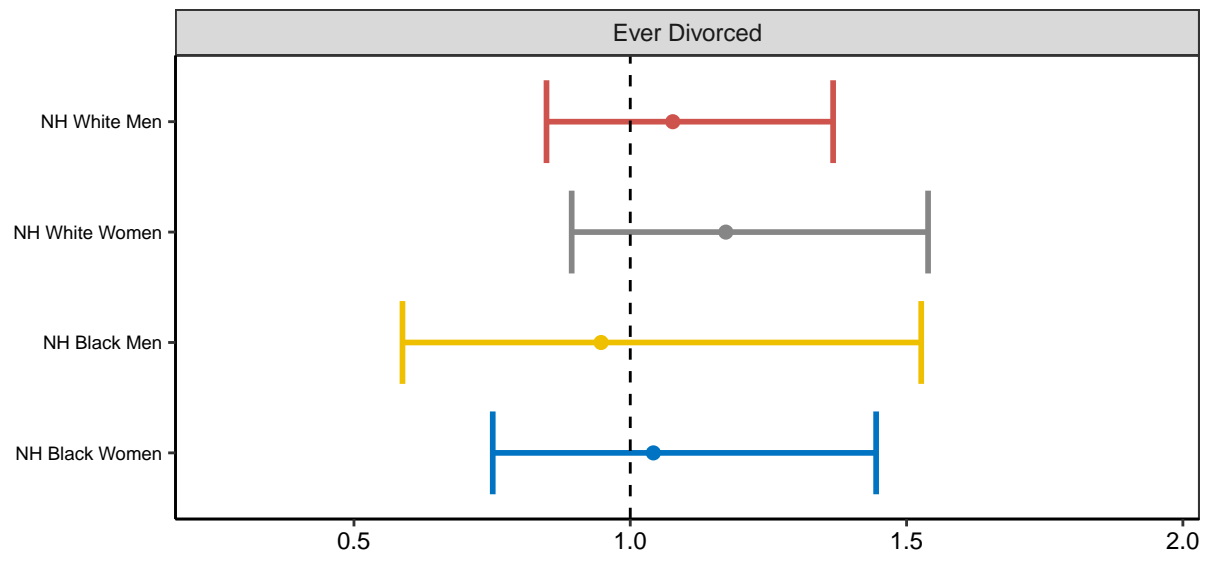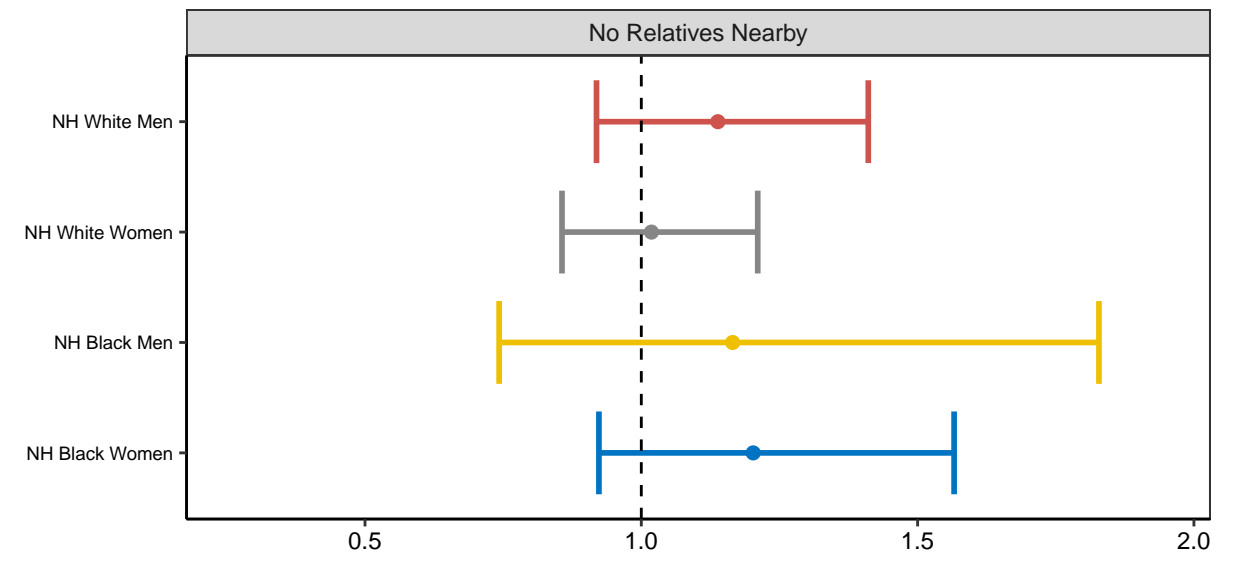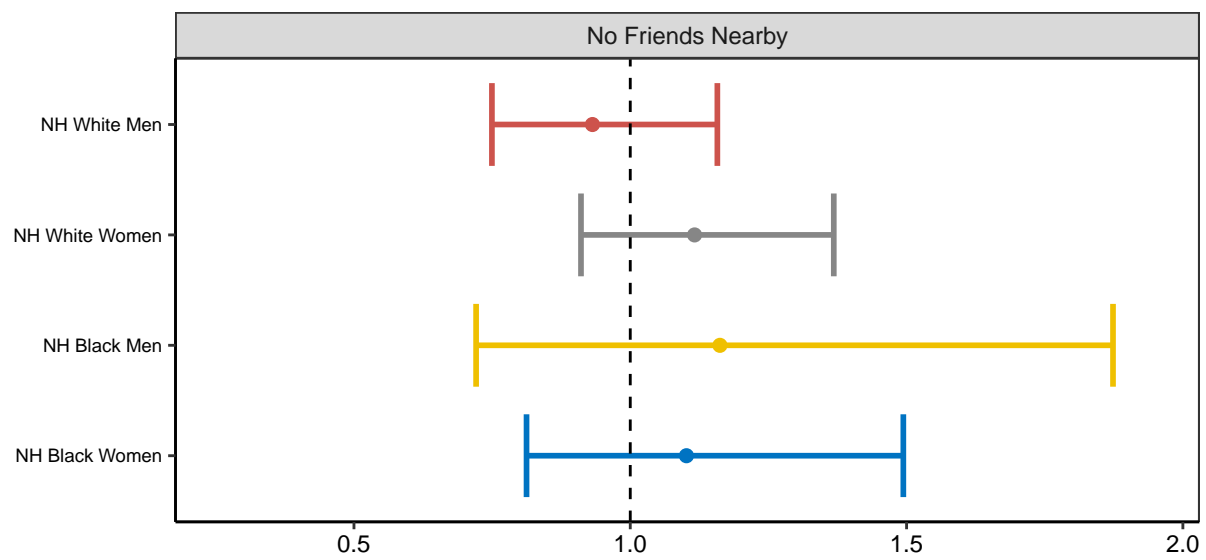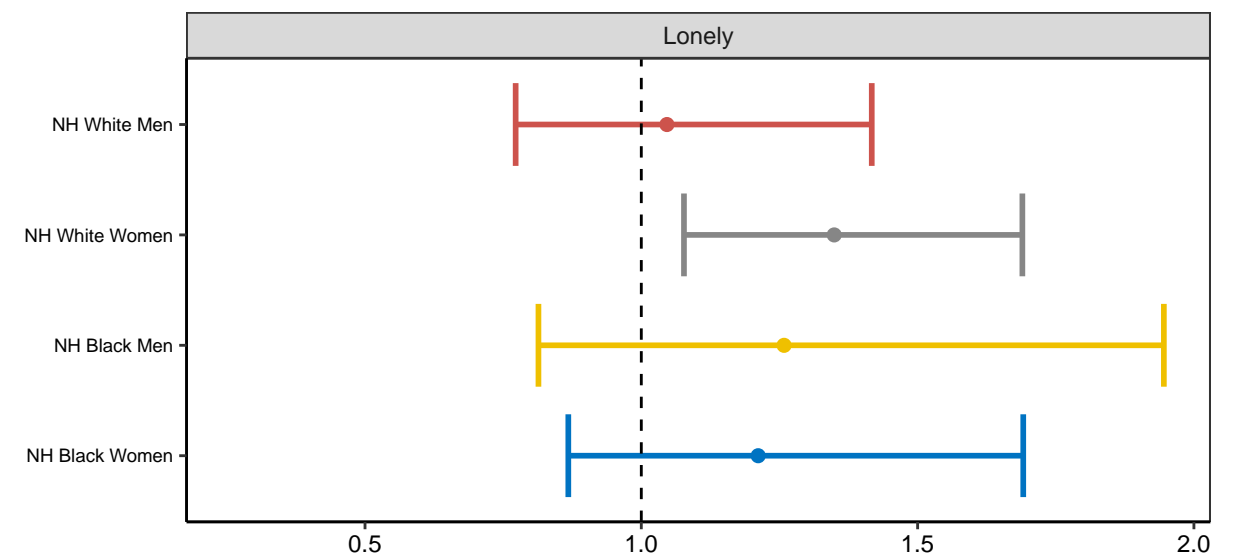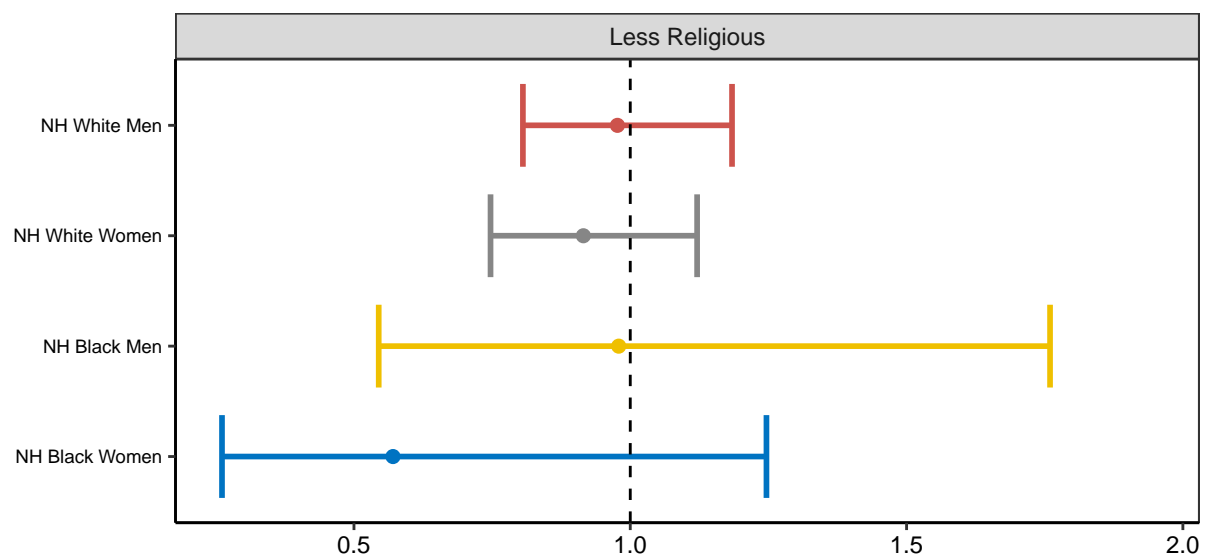

Hazard Ratio

# Genetic

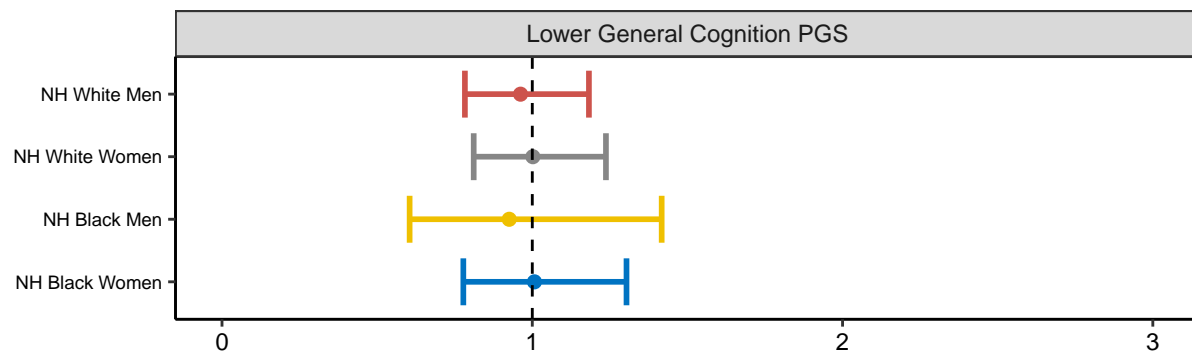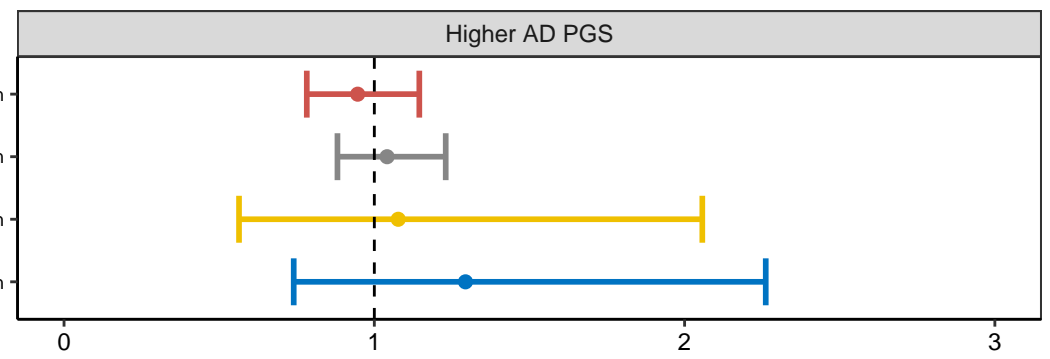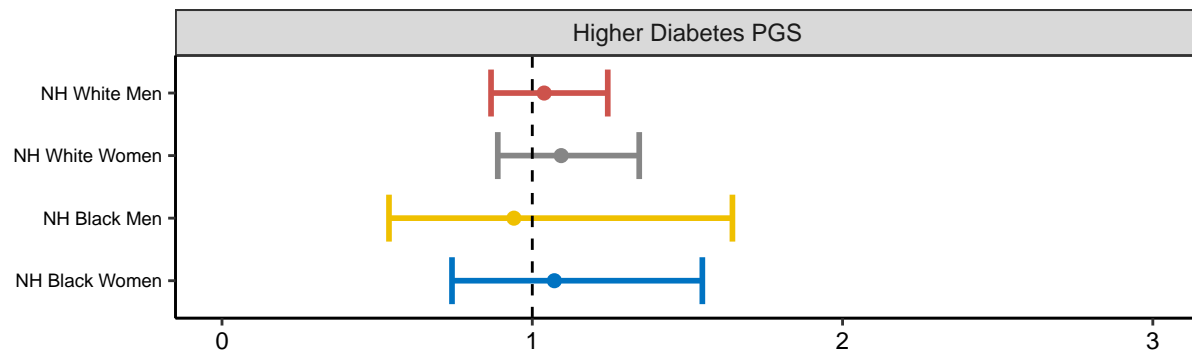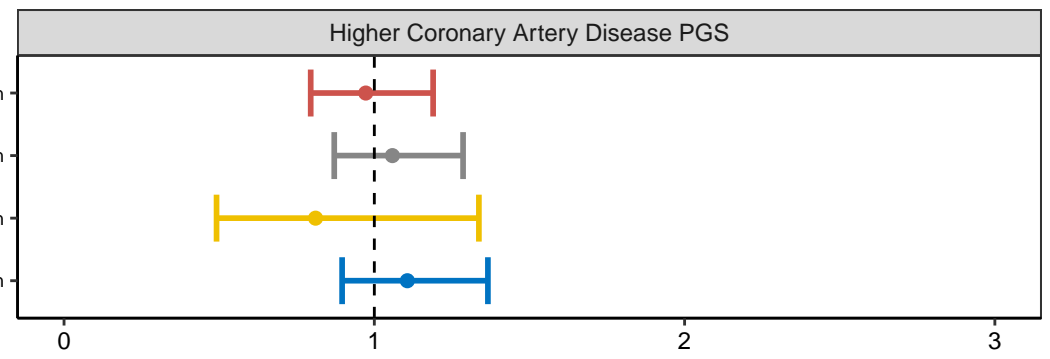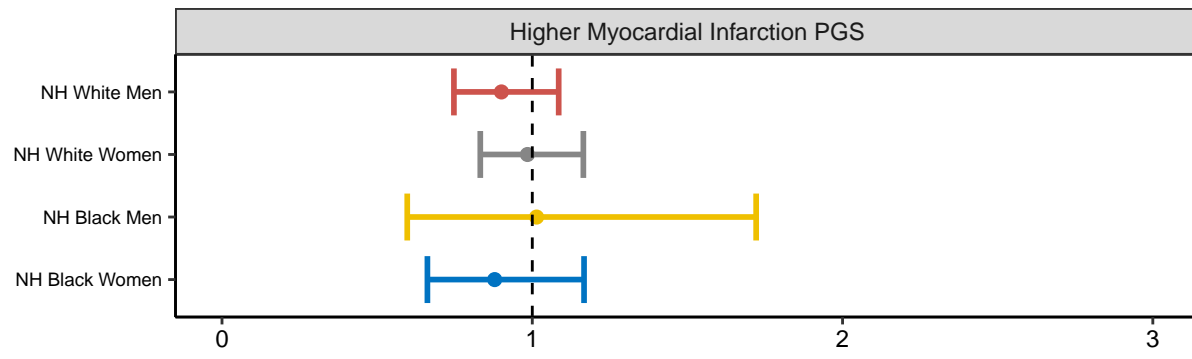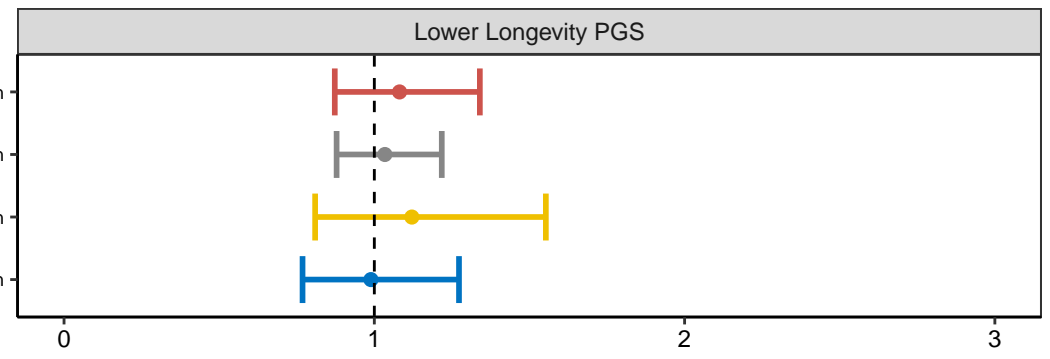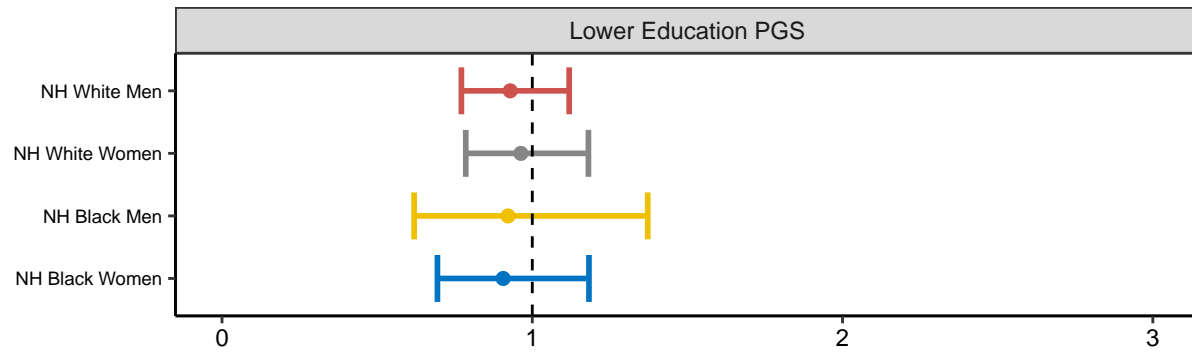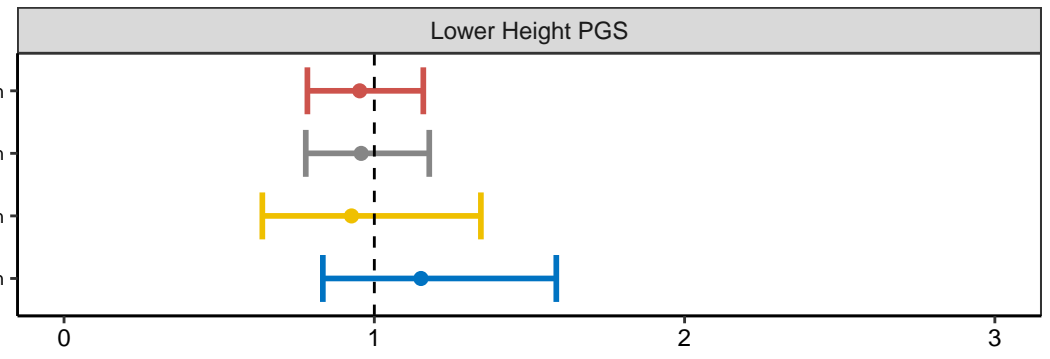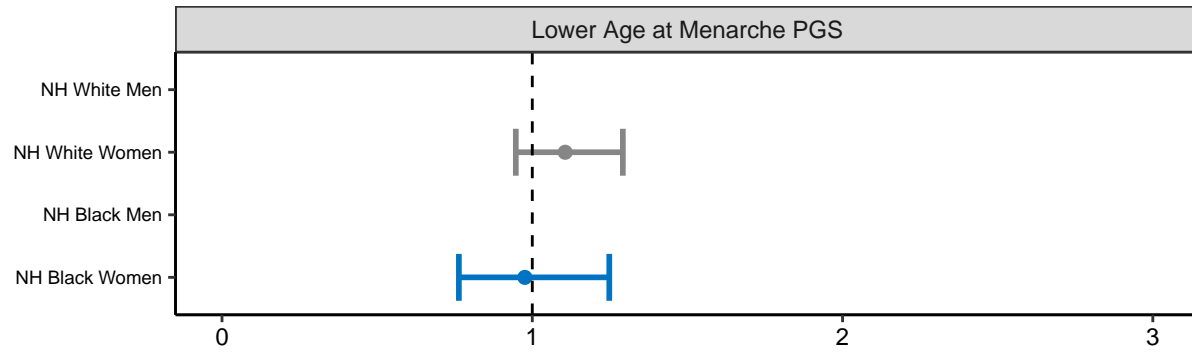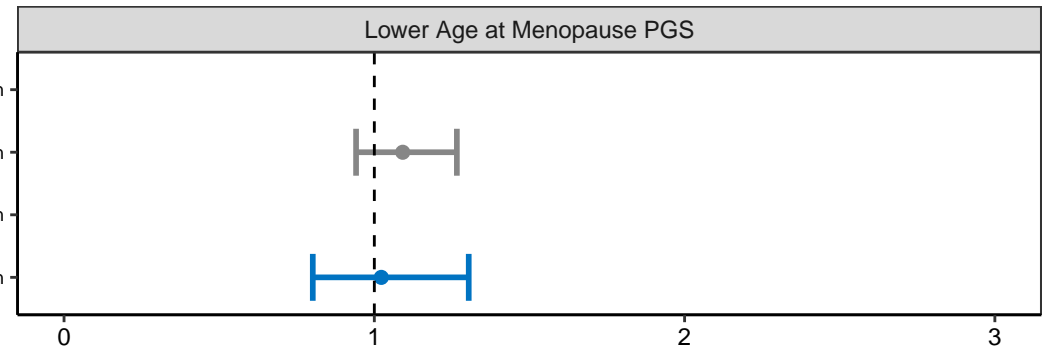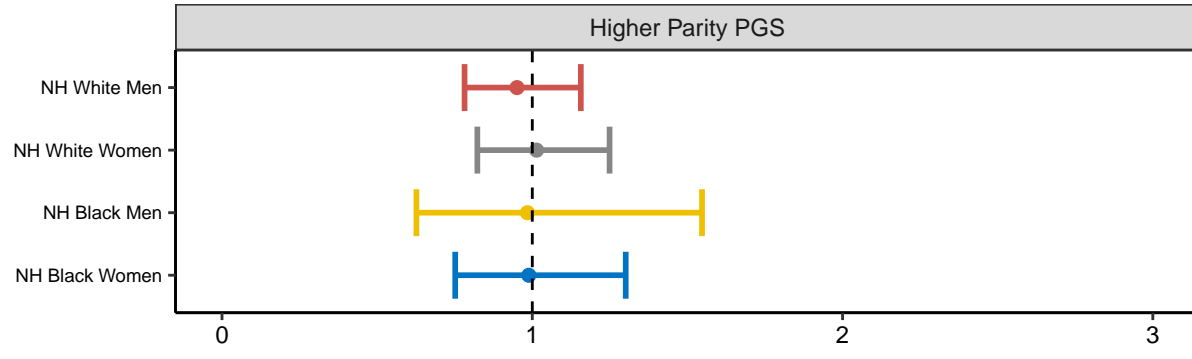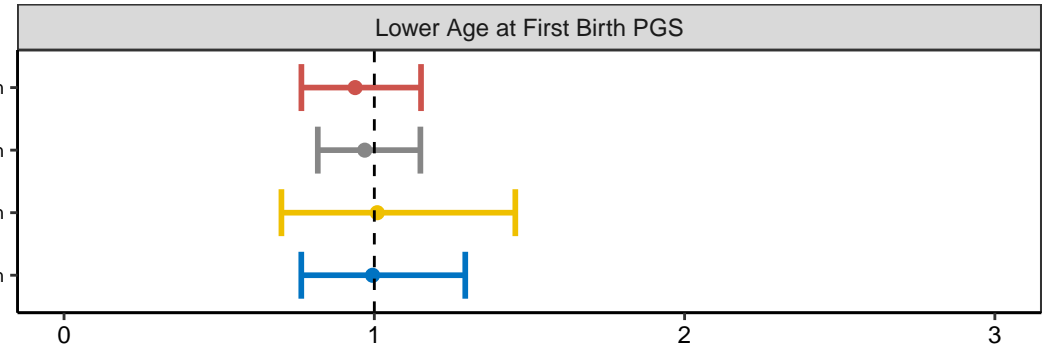

Hazard Ratio
