# Supplementary material for: A data-driven prospective study of dementia among older adults in the United States
Source: PubMed Central journal article supplement (PMC7540891; doi:10.1371/journal.pone.0239994), 2020-10-07
Supplement: pone.0239994.s006.pdf [file pone.0239994.s006.pdf]

NH White Men (n=2561)

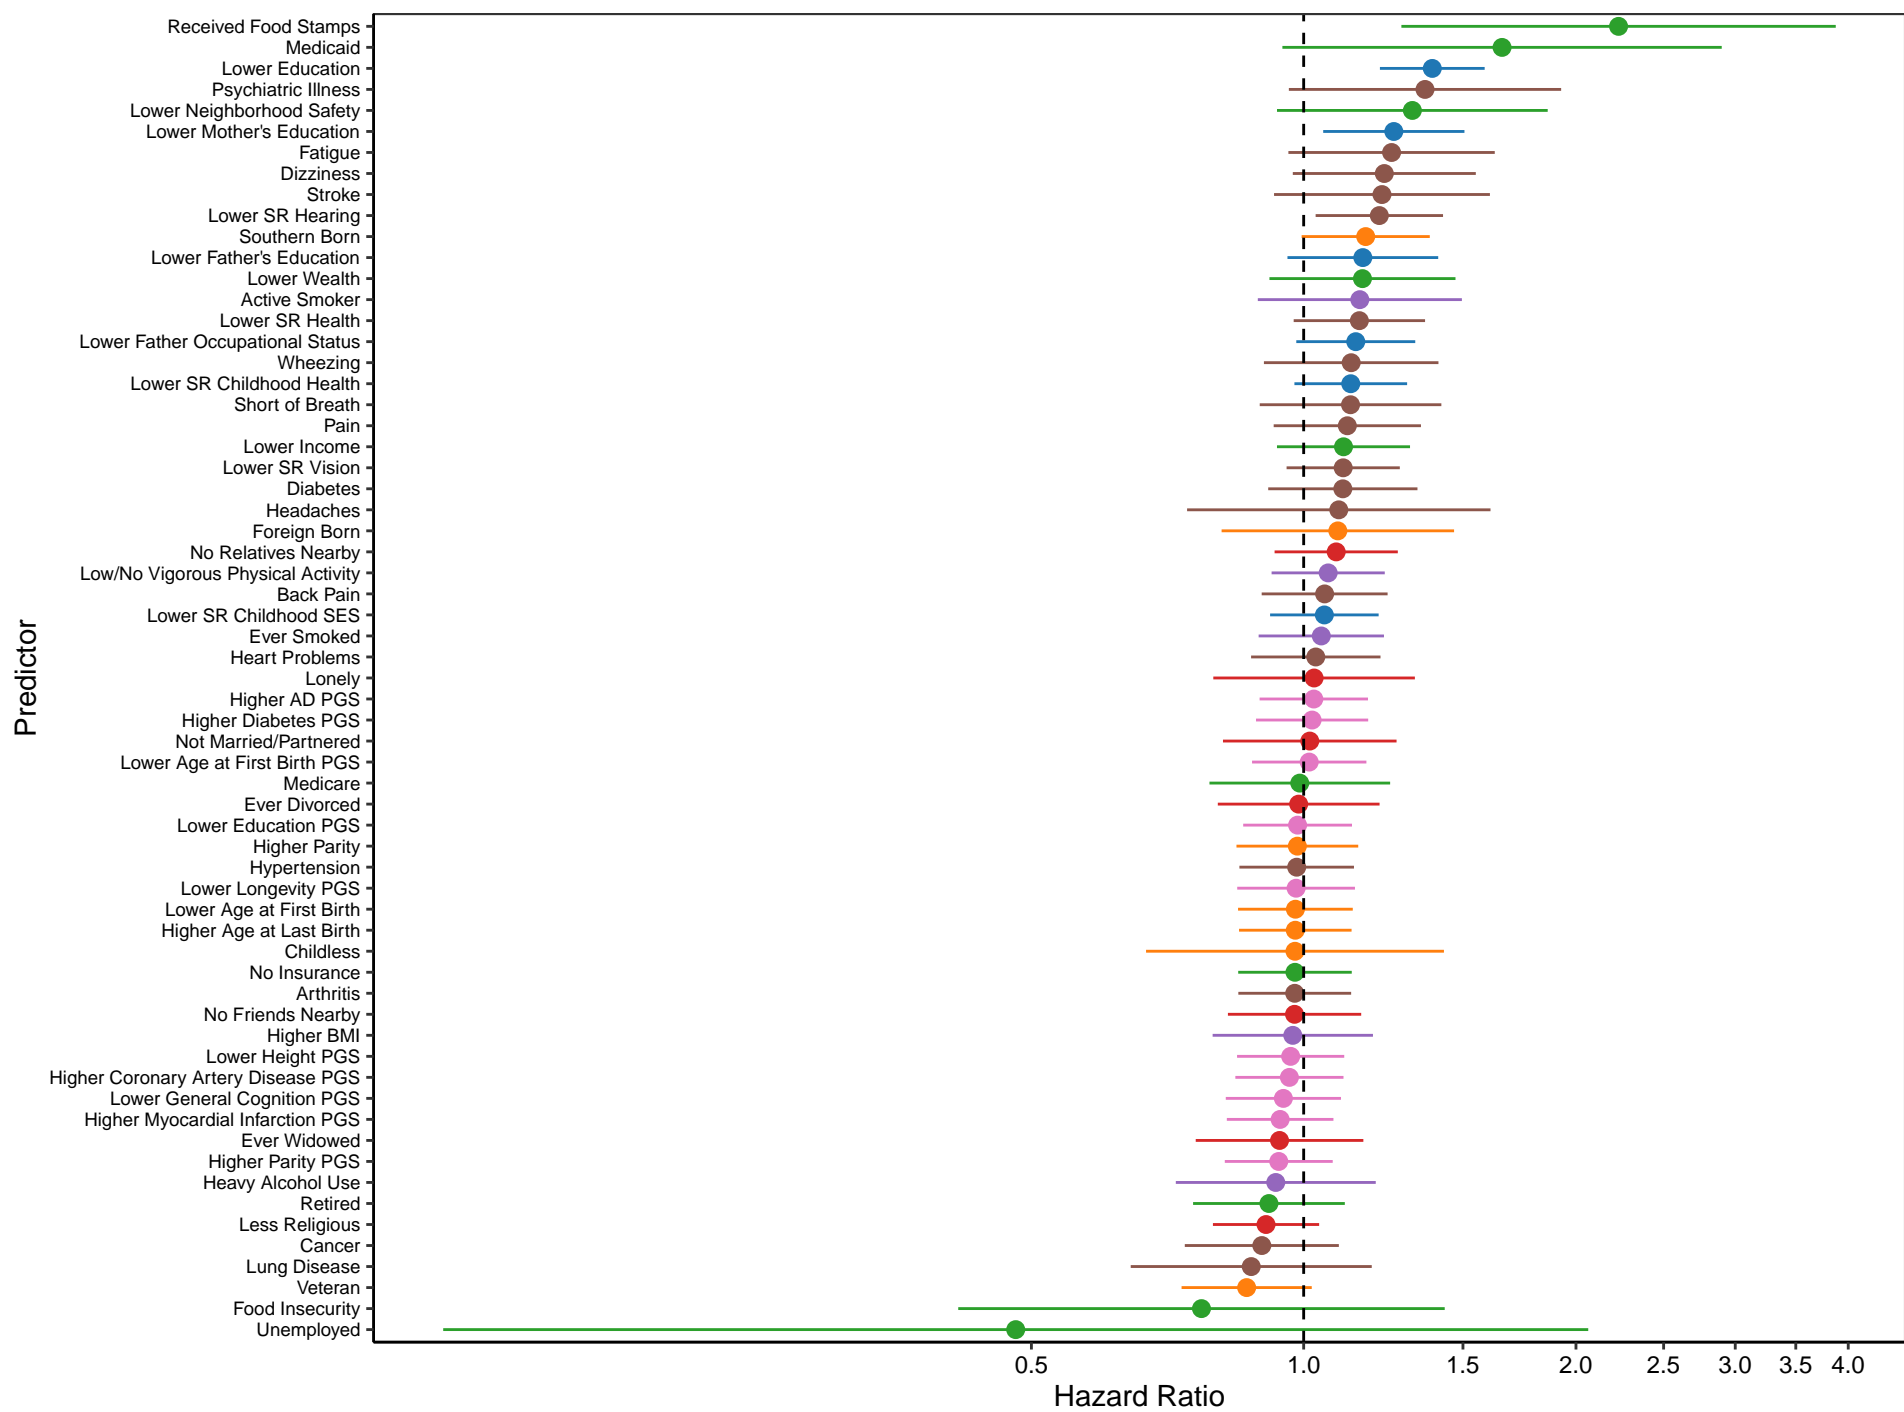

NH White Women (n=3377)

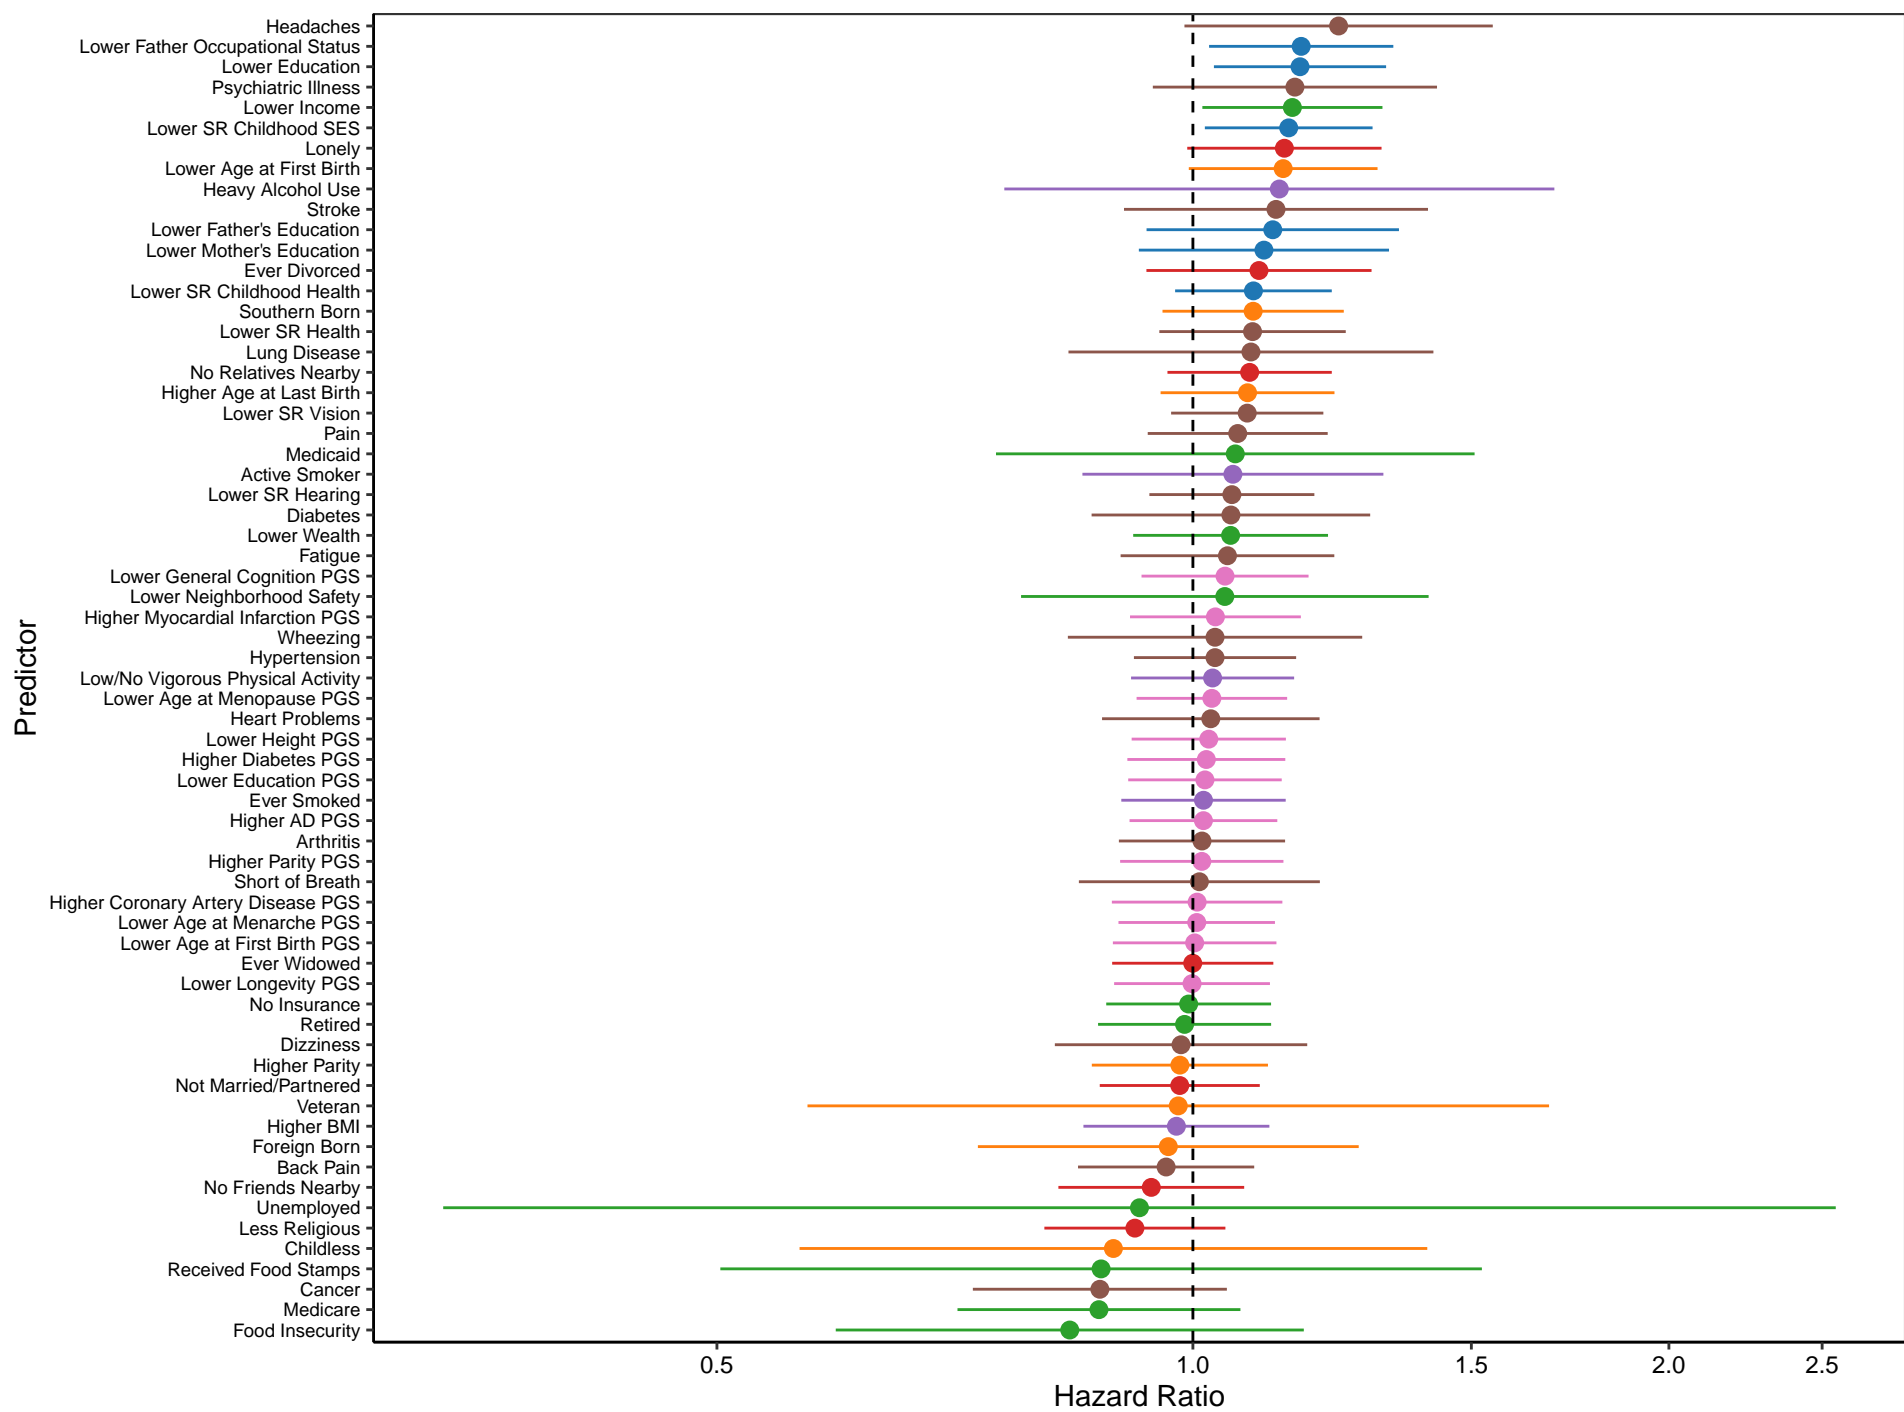

NH Black Men (n=283)

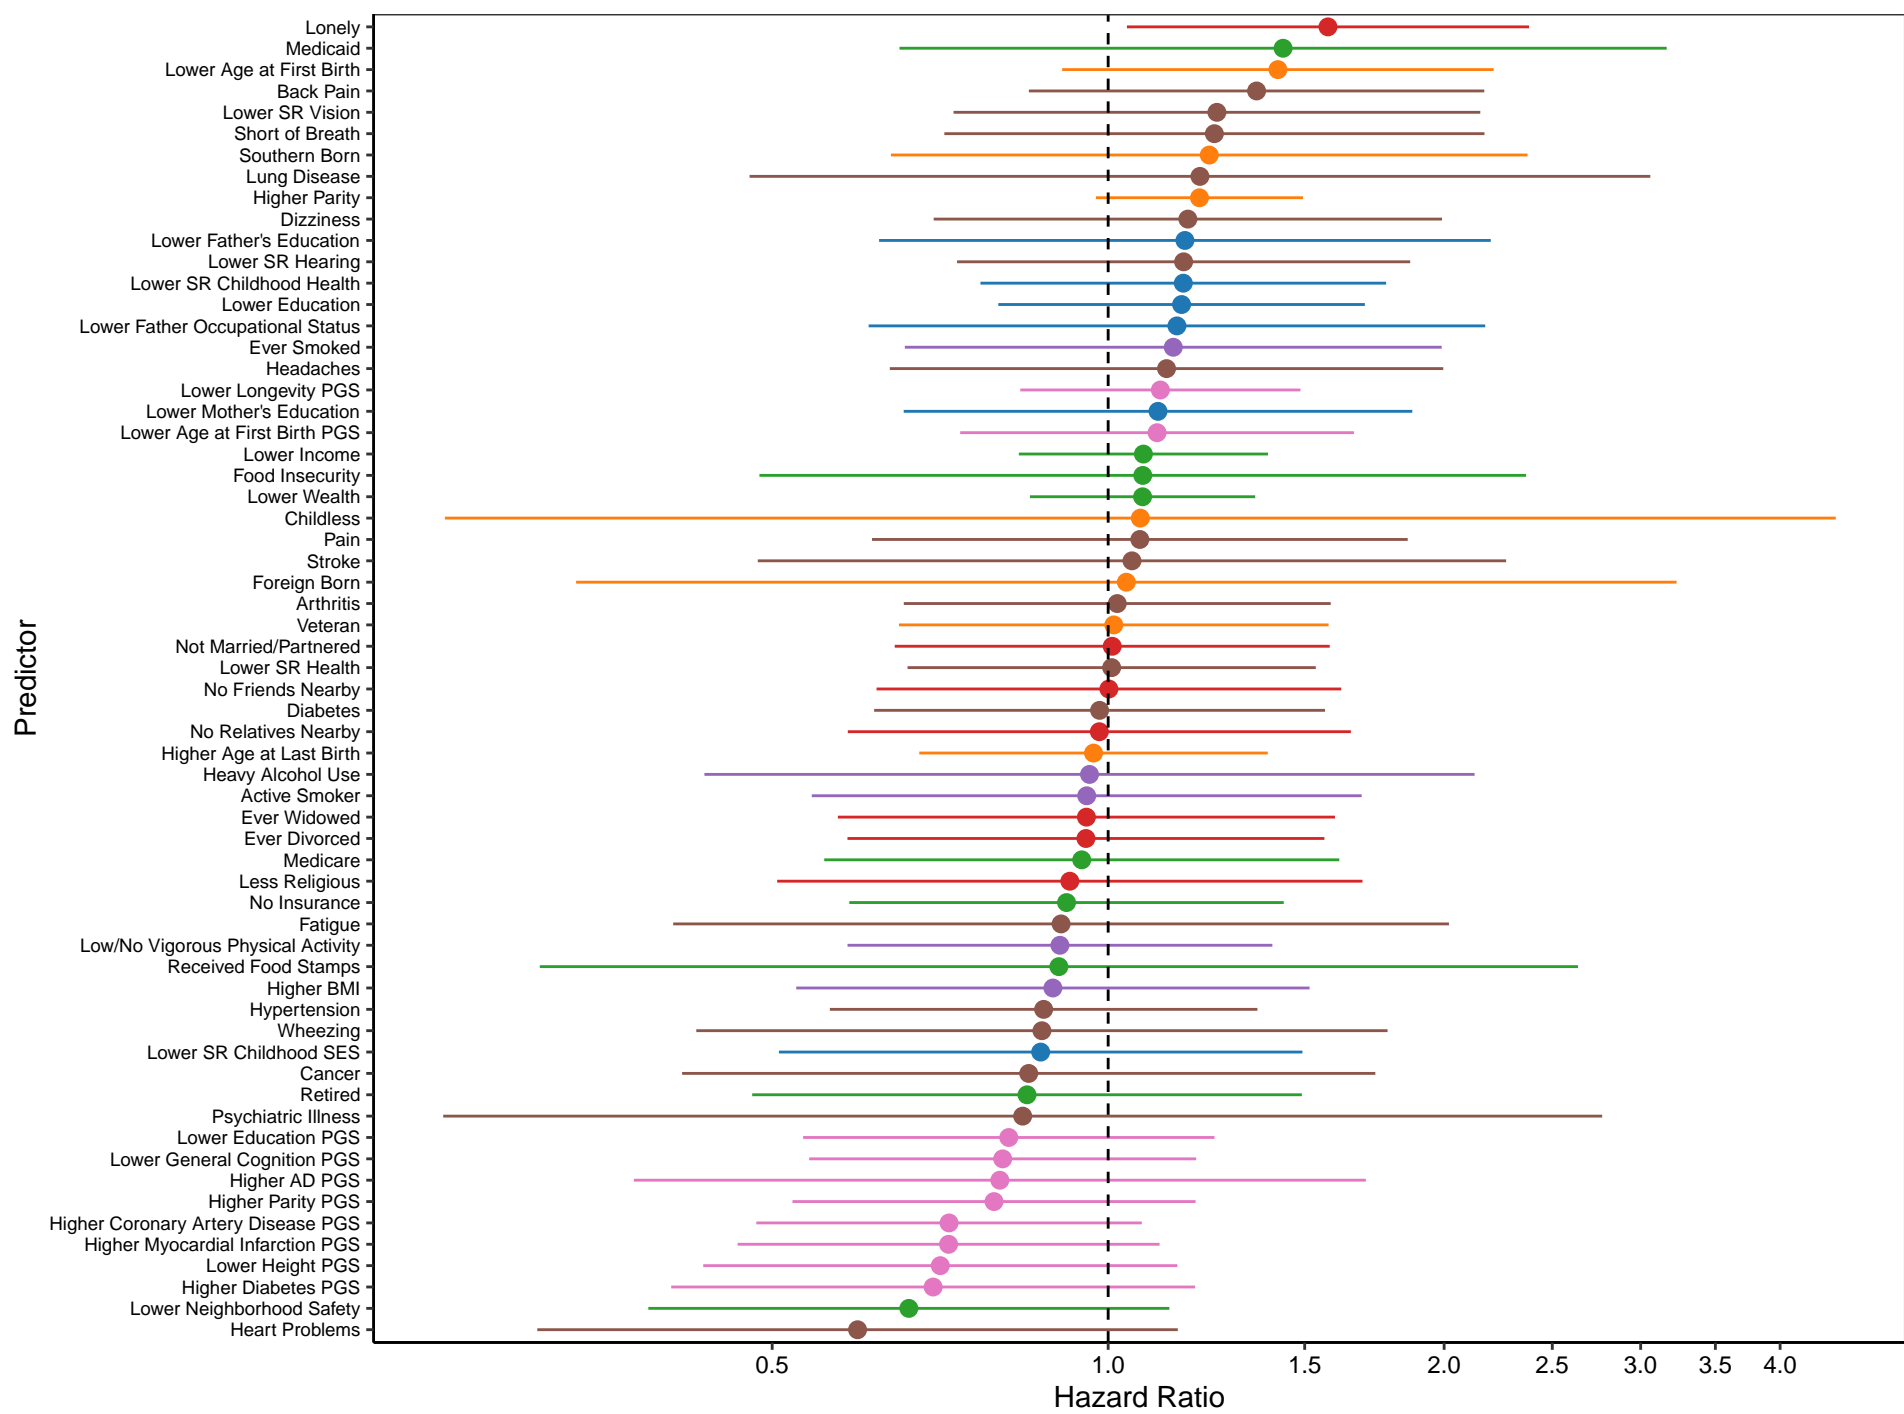

NH Black Women (n=525)

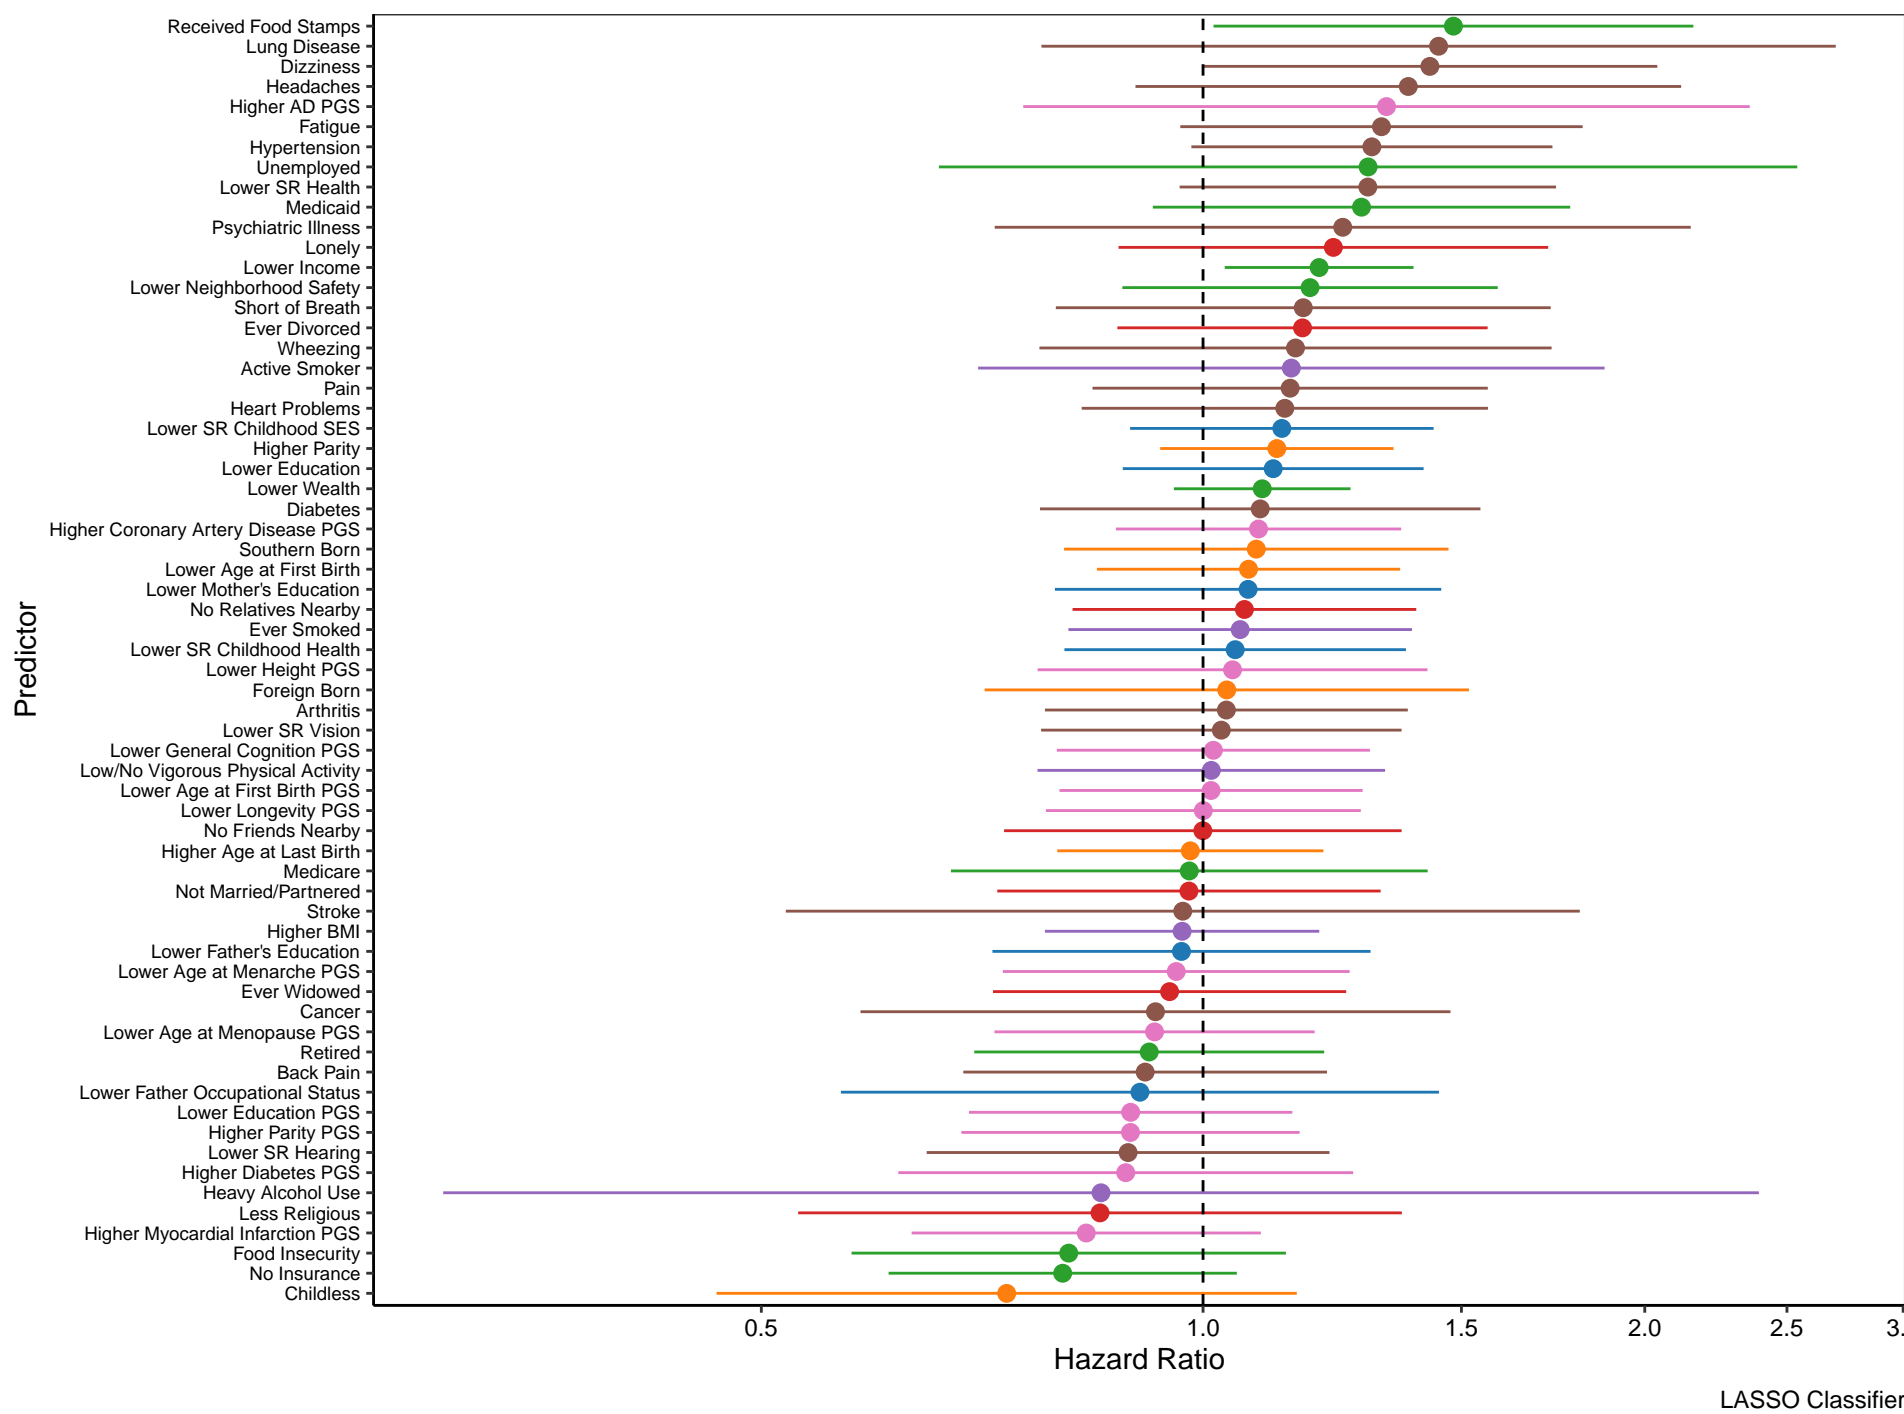

● Early-Life    ● Economic    ● Behaviors    ● Genetic  
● Sociodemographic    ● Social Ties    ● Health
